# Supplementary material
Source: Elsevier journal article supplement (https://authors.library.caltech.edu/46146/7/mmc2.xlsx)
Supplement: mmc2 [file mmc2.xlsx]

## Sheet: XRF core scanning
Suppl. table 1: raw XRF core scanning data (Al, Ca, Ti, Fe)
[mbsf]	Al area [total counts]	Al ChiSqr	Ca area [total counts]	Ca ChiSqr	Ti area [total counts]	Ti ChiSqr	Fe area [total counts]	Fe ChiSqr
192.4	581	1.1	222896	1.1	461	0.9	8388	1.4
192.41	535	0.4	225997	0.9	480	1	7697	1.6
192.42	560	0.9	221459	1	647	1	8257	1.2
192.43	764	0.7	194332	0.9	845	0.6	9982	0.9
192.44	625	0.9	209443	0.7	572	0.9	9468	1.1
192.45	618	0.7	224094	0.7	601	0.8	7945	1.2
192.46	619	1.5	225901	1.2	549	0.9	7887	1.7
192.47	695	0.9	223408	1.1	539	1	7971	1.5
192.48	748	0.5	219162	1.2	608	0.7	8033	1.4
192.49	552	0.5	225170	0.7	601	0.7	7804	1.2
192.5	627	0.8	224643	0.9	514	0.7	7654	1.8
192.51	462	0.5	224017	0.8	467	0.8	7469	1.3
192.52	495	0.6	227437	1.1	462	0.5	6928	1.9
192.53	476	0.9	221627	0.7	475	0.4	7157	1.2
192.54	390	0.9	219929	0.9	414	0.8	7734	1.6
192.55	476	0.7	219376	1.3	442	0.8	7256	1
192.56	467	1.2	218450	1.2	467	0.6	6894	1.9
192.57	263	1	222218	0.5	311	0.5	6676	2
192.58	417	0.7	221272	0.6	400	0.8	6911	1.2
192.59	397	1.1	229484	0.7	463	0.5	6235	1.5
192.6	397	1	231944	0.8	379	0.7	5871	2.1
192.61	407	0.7	240476	0.9	340	0.6	5928	2.4
192.62	420	0.8	234866	1	437	0.4	6438	1.9
192.63	346	0.6	238808	0.4	248	0.9	6250	2.2
192.64	440	0.7	237812	0.8	279	0.3	5954	2
192.65	433	0.6	236455	0.6	400	0.6	6023	1.6
192.66	253	0.3	236837	1.2	414	0.7	6488	2.8
192.67	436	0.8	230796	1.1	480	0.6	5853	1.9
192.68	159	0.3	167724	1.3	226	0.6	5210	1.7
192.69	294	0.8	149107	1.8	373	0.6	5214	2.8
192.7	232	1.9	139785	1.5	366	0.5	4624	3
192.71	228	1	134038	1.7	221	0.5	4392	3.5
192.72	286	1	139084	1.3	252	0.4	4829	2.6
192.73	300	1.8	140505	2.2	298	0.7	4164	2.7
192.74	262	1	143173	0.8	344	0.5	4651	3.8
192.75	394	2.2	140083	1.5	277	0.4	4046	3.7
192.76	158	0.6	124886	1.1	288	0.6	4448	2
192.77	247	1	129373	1.2	257	0.5	3504	2.3
192.78	143	0.5	142474	1	249	0.8	4674	1.9
192.79	171	0.3	124214	0.7	137	0.2	3699	1
192.8	348	1	159722	1.1	297	0.5	4806	1.3
192.81	407	1	178963	1.1	333	0.6	7070	4.6
192.82	346	1.2	175807	1.1	446	0.4	5737	2.4
192.83	346	0.8	185174	1.4	421	0.8	6206	1.5
192.84	311	1.4	177348	0.9	277	1.1	6388	2.6
192.85	362	1.3	185372	0.8	383	0.8	6551	3.6
192.86	437	1.3	196270	1.1	280	0.4	6034	3.3
192.87	329	0.8	191715	1	262	0.5	5910	3
192.88	414	0.7	194590	1	520	0.7	6317	3
192.89	365	0.3	199707	1.4	349	0.8	5773	1.7
192.9	314	0.5	198063	1.6	358	1	6074	1.5
192.91	341	0.3	218267	0.7	289	0.6	5713	1.7
192.92	234	0.8	206134	1	328	0.9	5223	1.4
192.93	1422	8.9	22483	4.7	108	0.7	72	2.4
192.94	984	3.3	14500	4.8	131	0.7	7	4.1
192.95	319	3.9	140011	4.8	180	0.2	808	9.2
192.96	171	1.2	180923	0.9	132	0.5	4632	3.6
192.97	128	0.8	184442	1.4	111	0.4	4298	4.5
192.98	247	1.3	165065	1.2	128	0.4	2984	5.7
192.99	1949	10	32149	2.8	98	0.7	103	3.3
193	156	1.8	164122	1.9	156	0.3	3106	3
193.01	130	0.8	171878	1.7	170	0.3	3513	3
193.02	259	1.4	179920	0.9	227	0.3	4601	5
193.03	299	0.4	159489	1.5	170	0.6	4236	1.7
193.04	186	1.1	95158	0.6	178	0.7	2713	0.7
193.05	461	1.3	122844	1.1	462	0.4	6587	1.6
193.06	567	1.1	152505	0.6	542	0.7	8413	0.6
193.07	549	1.1	168656	0.7	895	0.7	10212	1.4
193.08	495	0.7	170144	0.6	902	0.5	10064	1.8
193.09	610	1.1	162503	0.7	689	0.5	10597	2.2
193.1	448	1.3	151079	1.5	775	0.6	9945	2.2
193.11	503	0.8	155408	0.5	809	0.7	10560	2.3
193.12	600	0.8	151253	0.7	780	0.8	10155	2.3
193.13	590	2.1	154596	1.2	946	1	10596	1.8
193.14	420	1.3	156865	0.9	868	0.7	10272	2.4
193.15	460	0.7	145848	0.8	818	0.8	10301	1.9
193.16	578	1.5	150875	1.3	785	1.2	10379	1.1
193.17	596	1.2	160836	0.6	841	0.7	10488	1
193.18	567	0.3	157248	1.2	742	0.6	10598	2.5
193.19	522	1.7	155737	1	838	0.6	10590	2.7
193.2	467	0.9	146196	1.2	891	0.7	10629	2
193.21	559	0.8	145671	0.6	589	0.6	9915	1.6
193.22	483	0.8	149845	1.3	712	0.4	10513	1.3
193.23	555	0.8	148830	0.9	637	0.7	10799	1.3
193.24	446	0.7	146160	0.9	745	0.7	9730	2.1
193.25	665	0.8	153718	1.3	714	1.1	10760	1.6
193.26	491	1.7	154206	1	808	0.5	9980	1.6
193.27	480	0.5	152350	0.5	753	0.7	9793	1.4
193.28	509	1.1	158142	1.2	762	0.6	10197	1.4
193.29	427	1	128521	0.5	550	0.4	7523	1.1
193.3	555	0.5	155484	1.2	660	1	9392	0.8
193.31	549	0.7	184076	0.4	839	0.6	10269	1.3
193.32	643	0.3	177306	1	888	0.9	9566	1.1
193.33	579	0.4	170488	0.7	609	0.7	9039	0.5
193.34	658	0.8	184435	0.9	803	0.8	10007	1.4
193.35	554	0.8	183879	0.7	840	0.7	9823	1
193.36	662	0.8	182280	0.4	789	1.4	10127	1.4
193.37	702	0.8	180039	0.8	760	0.8	10116	1.3
193.38	610	0.9	174388	0.8	868	0.6	10356	1.1
193.39	572	0.8	165248	0.9	527	1	10392	1
193.4	532	1.4	148466	0.9	706	0.8	9393	1.9
193.41	528	0.6	157327	1	761	0.7	9991	1.4
193.42	596	0.8	158470	1	743	0.7	9929	1.6
193.43	530	0.8	155171	1	780	0.5	10298	1
193.44	585	0.7	146949	1.3	678	0.8	9527	0.9
193.45	510	1.4	139345	1.6	686	1.2	9122	1.5
193.46	384	0.3	143141	2.2	703	0.9	9499	1
193.47	456	1.4	144992	0.5	690	0.7	9649	0.8
193.48	437	0.7	141792	0.8	768	0.3	9032	0.9
193.49	562	0.9	156562	1.1	798	0.5	10112	0.8
193.5	608	0.7	162910	0.6	992	1.1	11563	0.9
193.51	710	0.5	156687	1.7	897	1	11845	0.9
193.52	649	0.3	169934	1.4	1255	0.6	12250	1.2
193.53	698	1.4	177491	1.7	1044	1.1	11148	0.8
193.54	702	0.9	186068	0.6	1059	1	11880	1
193.55	800	0.9	189900	0.6	1192	0.8	12020	0.6
193.56	753	0.4	189321	0.8	1056	0.3	11850	0.8
193.57	731	0.6	191348	1	970	0.5	11627	0.8
193.58	834	0.7	189622	1.1	1091	0.7	12201	2.1
193.59	910	0.6	193190	0.7	1182	0.6	12506	0.9
193.6	593	0.9	155230	0.8	1006	0.5	9489	1
193.61	562	0.4	161512	1	896	0.9	9539	0.9
193.62	748	1.2	179844	1.1	936	1.4	11287	1.5
193.63	797	0.9	171929	0.9	990	1	11021	0.5
193.64	740	0.5	176847	1.4	882	1	11208	0.8
193.65	779	0.7	187521	0.7	1135	1.3	11956	0.4
193.66	825	0.5	184189	0.9	1027	1.2	11735	1
193.67	803	0.8	185480	0.5	961	1.1	11624	0.8
193.68	633	0.5	180084	0.7	1011	0.5	11250	1.6
193.69	643	0.8	183020	0.6	925	0.9	11097	1
193.7	732	0.8	181975	1	944	1	11301	1.1
193.71	716	0.6	185989	0.7	835	0.7	11388	1.2
193.72	752	0.6	188267	1.1	944	0.5	11323	1.2
193.73	897	0.7	184107	0.7	1060	1.4	11706	1.1
193.74	780	0.6	187555	0.9	1050	1.4	11671	1.6
193.75	671	0.8	183868	0.9	1130	0.6	11781	1
193.76	848	0.6	185465	0.8	1001	1.3	12540	0.8
193.77	797	1	176867	0.6	1031	1.1	13347	1
193.78	853	0.5	178839	1.5	1215	1.1	13464	0.7
193.79	678	0.5	180223	1	1103	1	13231	0.9
193.8	925	1.3	183240	0.6	1255	1	13372	0.6
193.81	980	1.3	177288	1	1446	1.4	13475	0.8
193.82	869	0.5	174257	1	1220	0.9	13527	0.8
193.83	842	0.7	171948	0.7	1157	1.1	12978	1
193.84	920	1	171627	0.7	1250	0.9	13118	1.1
193.85	840	0.6	169357	1	1270	0.6	13434	0.9
193.86	908	1.1	174250	1.1	1288	0.7	13446	0.8
193.87	790	0.8	180422	1.1	1116	1	12696	0.9
193.88	844	0.8	181148	0.7	1111	1	12176	1.3
193.89	794	0.7	176934	0.4	1046	1	11997	0.6
193.9	830	0.6	182718	1.1	984	0.7	11164	0.6
193.91	780	1	183403	0.6	1178	1.1	11357	1
193.92	775	0.7	180798	1.4	1119	1	12235	0.7
193.93	851	0.6	176750	0.7	838	1	12083	0.6
193.94	801	1.4	185254	0.8	1029	1.1	12093	1.4
193.95	750	0.8	180799	1.2	1090	0.8	11499	0.8
193.96	772	0.7	183998	0.5	928	1.1	11682	1.1
193.97	800	0.7	182824	1.2	1031	0.5	11281	1
193.98	801	0.5	184201	0.6	1009	1.3	12190	0.9
193.99	744	1.3	185186	1.1	1150	0.7	11947	2
194	715	0.8	181759	0.8	1118	0.6	12367	0.9
194.01	714	1	180687	1.2	956	1.1	12539	0.6
194.02	788	0.3	184454	1.2	1325	1.2	12356	1.1
194.03	826	0.7	177026	0.9	1017	0.7	12429	0.9
194.04	902	0.6	180149	0.8	1175	0.9	12983	0.9
194.05	883	1.1	176789	0.6	1127	0.9	13479	0.9
194.06	831	0.2	169671	0.6	1180	1.3	13153	0.9
194.07	919	0.4	173126	0.8	1247	0.7	13157	1.3
194.08	804	1.4	165689	0.9	1012	1.1	13265	1.4
194.09	902	0.9	149718	1	1005	1.5	11743	0.8
194.1	849	1	177717	0.6	1156	0.8	13449	1
194.11	785	0.5	183441	0.7	1017	1	12791	1
194.12	936	0.6	184928	1.3	1103	1.7	12546	1.3
194.13	781	0.5	186758	1.5	984	1.5	12649	1.1
194.14	857	0.8	188843	0.6	1150	0.7	12059	1.1
194.15	887	0.9	195420	1	1085	0.7	12542	1.4
194.16	830	1.2	190209	1	1134	0.6	13013	1.1
194.17	745	0.6	190948	0.9	1146	0.7	12586	1
194.18	830	1.1	190052	0.9	1256	1	12690	1.1
194.19	831	0.5	191918	1.1	1085	0.6	12431	1.2
194.2	894	0.7	187662	0.9	1200	1.6	13347	1.3
194.21	876	0.5	188370	0.5	1355	0.7	13447	0.7
194.22	906	1.6	187072	1.1	1099	0.7	12323	1.4
194.23	885	0.9	185131	2	1254	1	12995	1
194.24	832	0.7	187280	0.5	1314	0.7	13061	1.2
194.25	868	1.4	184099	1.1	1252	0.8	12969	0.8
194.26	769	1.3	189013	1.4	1219	0.8	13007	1.4
194.27	851	0.5	188180	1.3	1014	0.8	12720	1.3
194.28	779	1.3	183337	1.4	1075	1.2	12007	1
194.29	789	0.3	189855	1.2	1285	0.7	12663	1.7
194.3	900	1.7	190275	1.2	1213	1.4	12454	1
194.31	821	0.7	189639	0.9	1146	1	12422	1.1
194.32	959	0.7	187967	0.9	1051	1.1	12151	1.5
194.33	336	0.7	137649	0.8	838	1.9	9046	0.9
194.34	407	0.6	127707	0.6	737	0.5	8317	0.8
194.35	272	0.5	69988	1	451	0.7	4520	0.5
194.36	783	1.1	185184	1	1054	1	11384	1.1
194.37	754	0.8	191438	1.1	1162	1.7	12830	0.7
194.38	722	1.4	195839	0.7	1095	1.2	12341	1.3
194.39	814	0.6	200687	0.8	1277	0.7	12924	1
194.4	882	0.7	202303	0.7	1217	0.6	13051	2
194.41	846	0.9	199663	1.2	1244	0.9	13458	1.1
194.42	810	0.6	207587	0.9	1363	1	12836	0.9
194.43	811	0.5	203338	0.7	1345	0.7	12409	1.3
194.44	846	0.7	199071	0.9	1105	0.9	12444	0.8
194.45	664	0.6	197071	1	1078	0.7	13109	0.8
194.46	774	0.5	199806	0.8	1128	1	12295	1.2
194.47	734	0.7	195930	1.4	977	1.2	12859	0.6
194.48	721	0.8	199761	0.7	1135	0.9	12484	1.6
194.49	754	0.8	199583	1.2	1247	1	12295	1.2
194.5	882	0.4	199354	0.7	1009	0.5	12294	1.3
194.51	781	0.8	194822	0.6	1364	1.3	13027	1.5
194.52	749	0.7	199852	0.6	1192	1.3	12502	0.7
194.53	715	1	200225	0.8	1296	1	12650	0.8
194.54	683	0.8	194909	1.6	1155	0.7	12537	0.9
194.55	768	0.9	195144	0.7	1301	0.6	12467	0.7
194.56	924	0.8	194139	0.4	1100	0.6	12874	1.1
194.57	734	1.2	194057	0.7	1279	0.7	12887	0.5
194.58	788	0.9	189014	1	1291	1	13032	1.4
194.59	693	0.6	193437	0.5	1293	1.1	12617	1.8
194.6	867	0.7	183828	1.1	1305	0.7	14061	1.4
194.61	726	1.2	188347	0.9	1334	1.2	12980	0.8
194.62	890	1.1	184141	0.9	1032	0.8	12939	0.8
194.63	920	0.6	188130	0.9	1192	1.1	13186	0.7
194.64	932	0.6	186219	1.2	1287	0.6	13381	0.9
194.65	838	0.7	182535	1.1	1123	1.2	13316	1
194.66	943	1.1	172531	1.2	1238	1.1	15037	0.7
194.67	915	1.1	170563	1.4	1410	1.2	17529	1.3
194.68	938	0.8	191099	1.2	1386	0.9	14974	0.7
194.77	274	0.4	105479	1.5	988	1.2	8985	1.7
194.78	599	0.3	155733	0.9	1079	0.9	12643	0.9
194.79	832	1.1	177178	0.7	1291	0.9	14254	1.2
194.8	957	0.8	166687	0.8	1253	1.1	16211	0.9
194.81	981	0.9	162308	0.8	1562	0.6	16605	0.5
194.82	908	0.4	159025	0.6	1585	1	16867	1
194.83	1009	0.9	155315	1	1779	1.6	17851	1
194.84	999	0.7	151093	0.8	1705	0.9	18933	0.8
194.85	773	1	142526	0.9	1668	2.1	27209	1
194.86	869	0.6	148178	0.7	1710	1	19565	1
194.87	1028	0.9	153556	0.3	1816	0.8	18593	1
194.88	856	0.9	151354	1.2	1656	1.3	17184	1.2
194.89	784	1.1	172788	0.6	1439	1	15712	1.2
194.9	201	0.8	89903	1	871	1.1	8877	0.8
194.93	988	0.9	169932	0.6	2363	1.2	23857	0.7
194.94	874	0.7	191333	1.5	1689	1.5	19735	1.7
194.95	1133	1.4	166882	0.7	2175	0.8	22330	0.7
194.96	1254	0.6	151391	1.4	2066	1.9	23085	1.5
194.97	1174	1.1	148407	0.7	2320	1	21501	1.1
194.98	1068	1.3	128667	0.7	2721	1.1	24244	1.2
195.13	586	0.8	81311	1.2	1642	0.9	15894	0.7
195.14	1107	1.2	137859	1.6	2040	0.9	19881	1.1
195.15	1092	0.7	132391	0.6	2046	1.5	18965	1
195.16	575	1.1	111719	1	2396	1.6	23416	0.9
195.17	984	0.7	118581	0.6	3124	0.8	26999	0.8
195.18	1147	0.6	142011	1.3	2696	1.4	21582	1
195.19	980	0.9	97345	0.7	3493	0.9	26773	0.8
195.2	761	1.1	111523	0.9	1245	0.8	13593	0.6
195.21	1098	1.1	141090	0.5	2078	0.6	20792	1.3
195.22	1281	0.7	138830	1.2	2578	1.4	24082	0.7
195.23	610	0.5	123168	0.7	1635	0.9	17230	1
195.24	861	1	141589	1.1	2277	0.5	21129	1
195.25	760	0.6	145058	1	2061	0.7	18507	0.9
195.26	900	0.5	140306	0.6	2120	0.8	20236	0.8
195.27	922	0.7	147527	1.5	1873	1.1	18497	0.8
195.28	921	0.6	145078	0.7	1557	1.3	18397	0.9
195.29	1119	0.9	138800	0.4	2345	1.2	21182	0.5
195.3	1225	0.6	150491	1.2	2072	0.9	20320	1.1
195.31	1165	1.3	152561	0.9	1967	0.7	18622	1.4
195.32	1122	0.6	132847	0.7	1935	0.6	18440	1.1
195.33	20	0.7	11806	1	439	0.7	2989	0.8
195.4	967	1.6	103926	0.9	3306	0.8	27143	0.7
195.41	1258	1.4	133637	0.5	2755	1	25364	0.9
195.42	1375	0.3	139591	0.9	2935	1.8	24672	1.2
195.43	1502	0.7	139851	0.8	2358	1.1	23780	1.2
195.44	1366	0.9	125686	1.2	2751	0.6	26349	0.9
195.45	1242	1.1	131663	1.1	2521	1.4	24856	1
195.46	1456	0.9	141971	0.9	2789	1.5	25031	0.4
195.47	1541	0.6	130106	0.7	2996	1.6	25780	0.8
195.48	1442	1.2	124719	0.8	2704	0.8	25428	0.5
195.49	1415	1.3	116949	0.8	2948	1.3	28248	1.1
195.5	1220	0.6	110128	1	2485	1.1	22375	0.8
195.51	1253	1.1	133524	0.7	2398	0.6	21448	1
195.52	1181	0.5	135615	1	2375	1	26422	0.6
195.53	1303	0.3	140689	0.6	2778	1.5	24523	1.1
195.54	918	0.6	128273	0.9	2012	1.5	21369	1
195.55	651	0.8	88155	0.5	1442	1.3	14070	0.6
195.56	738	0.8	89928	0.8	1683	1	15549	1.2
195.57	1051	1.2	112551	0.7	2390	1.2	22680	0.6
195.58	1308	1.3	141836	0.7	3069	0.7	27214	0.8
195.59	1358	1.1	144309	1.2	2619	1.2	24417	0.7
195.6	737	0.4	98442	0.4	2502	0.4	21106	1.1
195.61	793	0.7	95042	0.6	2498	1.5	20113	0.4
195.62	528	0.5	56129	0.9	1334	1.1	12338	0.5
195.63	894	1	89755	1.3	2090	1.2	20191	0.6
195.64	1017	0.5	94143	1.1	2394	1.1	21908	1.3
195.65	1212	1	100317	0.7	2950	1.1	25264	1
195.66	1042	1.2	79185	1	2531	1.2	21754	0.4
195.67	1231	0.8	102199	0.7	3145	0.5	27339	0.6
195.68	1176	0.7	94167	0.6	2765	1.6	25258	1.2
195.69	1129	1.1	105174	1.1	2893	0.6	25373	0.9
195.7	469	0.7	50344	1.3	1567	1	11613	0.9
195.71	420	0.9	38952	0.8	2362	0.5	14308	0.8
195.72	776	1.1	77981	1.2	2692	0.5	21383	0.8
195.73	754	1.7	86258	1.1	1844	0.5	18353	0.5
195.74	611	1.4	60542	0.7	1202	0.4	12084	1.2
195.75	1503	1.8	131127	0.9	2523	0.7	24778	0.7
195.76	1417	1	125669	0.7	2420	0.6	23526	0.8
195.77	1550	1.1	130556	1.1	2309	1.7	23759	1.3
195.78	1535	1.3	128636	1.1	2456	0.7	25239	0.5
195.79	1462	0.8	127191	0.7	2402	1.1	23549	0.8
195.8	1515	1.4	127997	1	2358	0.7	24371	0.9
195.81	1415	1	126087	0.9	2229	1.1	24536	1.4
195.82	716	0.8	88865	1.3	1882	1.3	18529	1.2
195.83	383	0.7	53900	0.8	1157	0.7	11852	0.8
195.84	188	0.7	29563	1	631	0.8	6607	0.8
195.89	492	0.5	80116	0.8	1831	0.8	15307	0.9
195.9	572	0.9	78438	0.6	1943	0.5	15446	0.5
195.91	928	0.8	95059	1.2	2261	0.8	22440	0.7
195.92	1345	0.7	105821	0.5	2477	0.9	23386	0.9
195.93	1373	0.5	116756	1	2788	1.7	23786	1.6
195.94	1249	1.2	109718	0.7	2281	1	22136	1.3
195.95	498	0.7	51897	0.9	1378	1.4	12620	1.4
195.96	488	0.9	53561	0.9	1426	1	11851	1.1
195.97	856	0.6	82220	0.7	1855	1	16851	0.8
195.98	409	0.8	40435	1.3	963	0.6	7991	1
195.99	1575	1	130057	1	2864	0.5	27134	1.3
196	1513	0.6	131000	1.3	2906	1.1	26933	1.3
196.01	1431	1.7	129124	1	2673	1.2	26310	0.5
196.02	1526	0.8	125307	0.8	2565	1.7	25056	0.8
196.03	1076	0.7	108108	0.8	2076	1.1	20832	1.2
196.04	1233	0.8	113705	0.7	2163	0.7	22179	0.5
196.05	1443	0.6	116540	1.3	2413	0.9	22865	0.7
196.06	1533	1	122313	0.8	2454	0.5	25303	0.8
196.07	1405	1.3	123634	0.6	2470	1	25211	0.7
196.08	70	1.2	14473	0.7	382	0.8	2802	0.6
196.09	963	1.3	75023	0.8	1426	0.9	15385	0.5
196.1	1662	0.9	123468	1.2	2665	1.7	27931	0.9
196.11	1548	1	131743	1.4	2746	1.3	26675	0.7
196.12	1311	0.5	115472	1	2637	0.9	25053	1.2
196.13	1345	0.3	114220	0.9	2824	0.9	24776	0.8
196.14	1172	0.9	93799	1.1	2565	0.9	22824	0.5
196.15	1242	0.6	113794	0.7	2467	1.4	23263	0.9
196.16	442	0.3	54678	0.8	1292	1	11409	0.6
196.21	1413	0.7	131330	0.7	2642	1.1	25642	0.8
196.22	1486	1.1	132928	1	2583	0.6	25659	0.8
196.23	1726	1.2	135054	0.4	2596	1.8	26599	0.6
196.24	1634	0.5	133790	1.3	2732	0.9	26400	0.7
196.25	1595	0.8	133124	0.8	2730	1.3	26758	1
196.26	1591	0.5	133600	1.3	2703	0.5	26420	1.2
196.27	1641	1	134112	1.2	2660	0.6	25662	0.6
196.28	1485	0.9	132303	0.4	2607	1.2	26094	0.6
196.29	1570	0.8	132048	0.6	2428	0.5	24867	1.2
196.3	1621	1.4	127053	0.7	2705	1	25271	1
196.31	1499	1	128884	0.8	2498	0.9	25625	0.9
196.32	1390	0.6	132053	1.1	2872	1.1	26987	1.2
196.33	1324	0.6	129321	0.7	2849	0.9	26216	0.9
196.34	486	0.5	55814	0.9	1009	0.5	9530	0.6
198.71	256	0.5	43196	0.4	1271	0.7	12910	0.5
198.72	869	1.4	67448	1.2	2070	1.1	20476	0.6
198.73	991	1.4	68357	0.9	2105	1	21191	1
198.74	1235	0.7	74019	0.6	2295	0.7	22674	0.6
198.75	1950	0.6	86487	1.2	2668	0.8	26521	0.7
198.76	1705	1.1	87477	0.9	2310	1	25105	0.6
198.77	1841	1	88550	1.1	2675	0.8	26439	1.2
198.78	2046	0.5	88272	0.7	2665	0.6	26624	0.9
198.79	1868	0.5	88661	0.7	2591	0.7	26342	1
198.8	1935	0.7	92183	1.1	2670	0.7	26589	0.9
198.81	1609	1.3	82503	0.3	2314	0.6	21027	1.4
198.82	1731	0.9	89708	1.3	2375	1.2	24692	1.8
198.83	1911	0.5	88001	0.5	2290	0.7	26089	1.1
198.84	1778	0.7	88004	0.5	2548	1	26270	0.7
198.85	1691	1	94171	0.7	2395	0.6	25919	0.9
198.86	1693	0.6	97088	0.6	2286	0.7	25662	0.8
198.87	937	1.4	59990	1.3	1534	0.6	15185	0.8
198.88	173	1.4	19014	0.9	561	0.6	5057	0.7
198.89	1203	1.2	63019	1.2	1692	0.7	16291	0.8
198.9	1531	0.8	88871	0.8	2176	0.7	23304	1.1
198.91	1552	1	86494	1.3	2280	1.1	22847	0.9
198.92	1466	0.6	81140	1.4	2227	1.3	21555	0.7
198.93	1308	1	78286	0.7	2141	0.9	19373	1
198.94	700	0.4	47312	1	1248	0.3	10581	0.7
198.95	1517	0.9	86491	1.4	2111	1.1	20396	0.7
198.96	1609	1.1	91276	0.7	2161	1	23703	0.9
198.97	1393	1.1	77999	0.8	1858	1.2	19460	1.1
198.98	1204	0.6	84966	1.2	1927	0.6	21549	0.9
198.99	179	0.6	17546	1.7	423	0.6	4312	0.7
199	165	0.8	19113	1	580	0.3	5332	0.7
199.01	389	0.7	43288	0.8	1221	1	12227	0.6
199.02	584	0.6	46278	1.1	1203	0.7	13175	0.9
199.03	1097	0.9	71433	0.9	1562	1.8	15022	0.8
199.04	611	1.1	63481	1	1495	0.5	14246	0.8
199.05	538	0.7	64104	0.8	1309	0.7	14977	1
199.06	724	1	70382	0.8	1482	0.9	15926	0.6
199.07	1348	1.2	91974	0.7	1987	0.9	20123	0.9
199.08	1708	0.5	104741	1.8	2277	0.9	22982	0.9
199.09	1848	1.1	102197	1.1	2403	0.6	23795	0.5
199.1	1779	0.6	106282	1	2312	0.9	24311	0.4
199.11	1198	1.5	87815	1.1	1895	1	19964	1
199.12	574	1.3	44269	0.9	952	1.3	10806	0.5
199.13	75	0.9	16845	1.1	375	0.8	4202	1.6
199.14	374	0.9	44265	0.5	1073	0.6	10526	0.8
199.15	1369	0.7	96609	1.2	1788	0.9	19066	0.7
199.16	1579	0.5	106501	1.2	2049	1.4	20104	0.5
199.17	1536	1	106740	0.8	2182	0.7	21971	1
199.18	1373	0.9	93872	0.9	1993	1	20158	0.6
199.19	1523	0.2	96606	1.2	2206	0.9	22241	1.3
199.2	1632	0.9	94582	0.8	2210	0.4	21648	0.5
199.21	477	0.4	31484	1.1	801	0.6	6763	0.9
199.22	891	0.9	63276	1.5	1324	0.7	12554	1.4
199.23	1686	1.2	100177	0.9	2182	0.5	22202	0.5
199.24	1678	1.4	101577	0.9	2129	0.6	23150	0.9
199.25	1709	1.5	105412	0.2	2211	1.4	22818	0.5
199.26	1564	0.7	99892	0.6	2284	0.6	22612	1
199.27	1497	0.8	98088	0.9	2112	0.9	22560	1.3
199.28	1874	1.5	104168	1	2253	1	24465	1.1
199.29	1817	1.1	104690	0.8	2406	1.1	25011	0.8
199.3	1797	0.3	100927	0.8	2479	1.3	25759	1.2
199.31	1951	1.7	103285	1	2554	0.4	23654	0.7
199.32	1890	0.6	105793	0.9	2432	0.8	23526	1.1
199.33	1852	1	105055	1.8	2329	0.5	23780	0.4
199.34	1848	1	98886	0.5	2545	0.7	24510	0.6
199.35	1802	0.7	101330	0.5	2296	2.5	23793	1.1
199.36	1644	0.6	100352	1.3	2328	1.1	21917	0.7
199.37	1719	0.7	98930	0.8	2259	1.1	21792	0.7
199.38	1843	1.1	99207	0.4	2157	0.9	22702	0.6
199.39	1812	0.8	99668	1.6	2393	0.7	22371	0.7
199.4	1748	1	98224	1.1	2417	0.9	23070	0.5
199.41	1474	1.1	90313	1.1	2043	0.7	21528	0.5
199.42	1192	0.6	74303	1	1836	0.8	16999	0.7
199.43	769	0.6	60309	0.8	1259	0.9	13542	0.9
199.44	937	1.6	64462	1.3	1260	0.8	14538	0.5
199.45	1561	1.2	93318	1.4	1909	2	19333	0.7
199.46	1862	0.6	107751	0.4	2489	1	22916	0.6
199.47	1787	0.6	106702	1.1	2345	1.1	22940	0.8
199.48	1461	1	93294	0.6	2117	0.9	19136	0.9
199.49	1427	1	86213	1	1868	0.8	18042	0.7
199.5	1530	0.8	97453	1	2103	1.6	20029	1.1
199.51	1648	1	101497	0.9	2103	0.8	19881	0.6
199.52	1015	1.5	72818	1.1	1658	1.1	14471	0.9
199.53	483	0.2	37649	0.6	1020	0.6	8037	1.1
199.54	654	0.8	51876	0.9	1296	1	11896	0.5
199.55	789	1	51280	0.6	1430	0.4	15437	1
199.56	897	0.7	63787	1.2	1763	0.8	19017	0.8
199.57	1483	1.4	79518	1.1	1906	0.9	23669	0.8
199.58	875	0.8	54780	0.8	1792	0.5	17939	0.8
199.59	591	0.7	48073	1.1	1591	0.8	17202	1
199.6	752	0.5	49586	0.8	1527	1.2	18947	0.9
199.61	899	1.2	56409	1.2	1847	1	20514	0.5
199.62	1879	0.7	78921	0.5	2607	0.8	27529	0.9
199.63	1965	0.8	79929	0.5	2439	1.6	26275	0.6
199.64	1803	0.5	79209	1.1	2391	0.7	28835	1.1
199.65	1733	1.2	78344	0.8	2576	1.1	29004	0.9
199.66	1813	0.6	78406	0.9	2492	0.5	28455	1
199.67	1873	1.3	80625	1	2633	1.4	28630	1.5
199.68	1821	1.2	82431	1	2355	0.6	27239	0.8
199.69	1723	0.6	79919	0.6	2317	1.6	26283	0.8
199.7	1916	0.9	82640	0.8	2456	0.9	27156	0.5
199.71	1911	1.2	80450	1	2587	0.6	27733	1
199.72	1891	1	79228	0.6	2476	1.6	29253	0.8
199.73	1933	0.8	79889	0.7	2666	0.8	29821	0.7
199.74	1997	0.9	81858	0.6	2500	1.4	28890	0.9
199.75	1981	1	84426	0.9	2509	1.2	27565	1.2
199.76	1905	1.4	85077	0.4	2483	1.5	28480	0.7
199.77	1967	1	85264	1	2642	1	28404	0.6
199.78	1725	0.7	84437	0.6	2618	1	27706	0.6
199.79	226	0.7	16617	1	414	1	5147	0.8
199.8	1563	0.6	82945	0.6	2251	0.8	21858	0.9
199.81	1669	1.3	89320	0.7	2213	1.1	24493	1.7
199.82	1567	1	86075	0.6	2330	0.8	26455	0.7
199.83	1662	1.3	87991	0.5	2185	1.2	26397	0.7
199.84	1719	0.9	86593	0.9	2388	1.7	26322	1.1
199.85	1797	1.1	84350	0.8	2440	0.9	27204	0.9
199.86	1745	0.7	85670	0.7	2445	0.9	27149	0.8
199.87	1851	1	83359	0.8	2423	1.1	26857	0.9
199.88	1839	0.3	84296	0.9	2434	1.2	27781	0.9
199.89	1783	0.9	86011	0.9	2417	1	26821	0.8
199.9	1786	0.9	86824	1.8	2567	0.9	27594	0.9
199.91	1811	1.1	83919	0.5	2488	0.8	27474	1.2
199.92	1924	1.3	84254	0.7	2477	0.8	28304	0.8
199.93	1777	1.1	85868	1.5	2526	0.9	27289	1
199.94	1867	0.9	84746	1	2756	0.6	28058	0.6
199.95	1744	0.5	85924	0.4	2529	1.1	28301	0.6
199.96	1758	1.2	84762	0.9	2378	0.8	27388	1.4
199.97	1834	1.1	85278	0.8	2613	0.8	27354	1
199.98	1919	0.7	82029	1	2666	0.9	26689	1.1
199.99	1955	1.6	81888	0.4	2585	0.8	28049	1.1
200.06	1538	1.1	87029	1.1	2508	0.9	25448	0.6
200.07	1323	0.5	92039	0.7	2186	0.8	25637	1.3
200.08	1833	0.9	88536	0.5	2469	1.1	26398	0.5
200.09	1355	0.6	94741	0.9	2275	1	25376	0.7
200.1	1652	0.3	90074	1.5	2356	1.3	26291	1.2
200.11	1031	0.7	94162	0.8	2122	0.9	26014	0.9
200.12	1577	0.9	89561	0.3	2329	1.2	25715	0.7
200.13	1786	1.4	88880	0.7	2619	1.1	28310	0.7
200.14	1945	1.4	88673	1.4	2896	1.5	28167	0.5
200.15	1496	0.4	93383	1.3	2304	1.1	26649	0.9
200.16	1160	1.2	94160	0.8	2109	0.7	26500	0.7
200.17	1971	1.2	88606	0.7	2547	1.5	28276	1.2
200.18	1747	1	89302	0.8	2562	1.6	27275	0.7
200.19	2051	1	85581	1	2437	0.8	27566	1.4
200.2	1982	1.1	88433	1.1	2695	0.5	27984	0.9
200.21	1830	1.9	87774	0.9	2707	0.9	28010	1
200.22	1972	0.9	90697	0.6	2528	1.5	26127	0.8
200.23	2051	1.2	91122	0.7	2530	1.2	27413	1.4
200.24	1890	1.1	86832	1.2	2508	0.8	29033	1
200.25	1861	1.5	88923	0.4	2474	0.5	28564	0.4
200.26	1940	1	87800	1.1	2536	0.4	29489	0.8
200.27	1877	1	88763	1.1	2696	0.9	29664	0.6
200.28	1815	0.7	88097	0.9	2614	0.7	29749	0.5
200.29	1847	0.7	87864	1.1	2748	0.8	29173	1
200.3	1851	0.8	88236	1	2649	0.6	28991	0.6
200.31	1870	0.9	87578	0.7	2519	0.9	29657	0.4
200.32	1975	0.9	87319	1.1	2718	0.8	29001	0.6
200.33	2001	0.8	87487	0.6	2732	1.2	28930	0.8
200.34	1993	0.9	87056	1.1	2539	0.9	28883	0.9
200.35	1951	0.9	86378	0.7	2689	0.5	28853	1
200.36	1959	1.2	87558	1.4	2651	1.1	28819	1
200.37	1929	1	89181	1.1	2690	0.8	29078	1.2
200.38	2072	1.1	87298	0.8	2649	0.9	29883	0.7
200.39	1970	1.1	89287	0.6	2629	0.5	29354	0.9
200.4	1945	0.8	89052	1.1	2645	0.9	27070	0.7
200.41	2053	1	87787	0.5	2516	1.4	26258	0.8
200.42	1908	0.5	81362	0.7	2449	1.2	25381	0.6
200.43	1603	1.2	81663	0.7	2211	0.9	24929	0.8
200.44	1117	0.7	67034	0.5	1845	0.5	22001	0.6
200.45	348	0.7	29490	0.6	864	0.6	8934	1
200.46	715	0.8	48965	0.6	1346	0.7	14529	0.7
200.47	1147	0.7	68264	1.2	1933	0.7	20063	0.4
200.48	1374	0.3	77568	0.8	1914	1.2	22949	0.9
200.49	1618	0.6	82055	1.1	2266	0.9	24758	0.8
200.5	1578	1.4	80511	0.8	2079	1.2	21837	1
200.51	1470	0.6	71998	1	2098	0.6	20351	1.4
200.52	1638	0.4	77924	0.8	2178	0.6	22566	0.8
200.53	1632	0.7	81181	0.8	2306	1	23557	0.8
200.54	761	0.8	52887	0.7	1608	0.4	15550	1.1
200.55	728	0.7	54667	1.1	1745	0.9	16171	0.7
200.56	760	1.1	56596	0.6	1730	0.5	18029	0.9
200.57	422	0.8	38940	0.3	1273	0.6	12224	0.6
200.58	484	0.5	34496	0.9	1170	0.7	9730	0.5
200.59	794	0.9	39658	1.4	1130	0.7	11869	1.2
200.6	1832	0.6	87283	0.7	2342	1	24181	1
200.61	1111	0.9	56532	0.4	1557	1.1	14638	1.2
200.62	1643	1.4	78721	0.8	2280	1.1	23535	1.5
200.63	1411	0.5	69702	0.7	2235	1.3	21589	0.3
200.64	1568	0.7	71022	0.5	2421	1	24752	1
200.65	2013	0.2	78588	0.7	2759	1.1	27469	1.3
200.66	1911	0.5	75104	1.1	2484	0.7	26077	0.6
200.67	1780	1.2	73784	1.7	2406	0.6	24404	0.8
200.68	1937	0.9	75175	1.3	2367	0.8	25515	0.6
200.69	944	1	45494	0.6	1689	0.6	16318	1
200.7	1577	0.7	71119	1.7	2491	1.2	26022	0.6
200.71	1748	1	74306	0.8	2539	0.7	24786	0.8
200.72	1565	0.7	73926	0.5	2384	1.1	23410	1.3
200.73	1561	0.6	71414	1.2	2460	0.7	23808	1.2
200.74	798	1	54502	1.5	2052	0.7	19306	0.6
200.75	919	0.5	57014	0.7	1952	0.8	18873	0.6
200.76	326	0.4	30377	0.8	1158	0.7	10387	1
200.77	459	1	35336	0.8	1176	0.9	11390	0.6
200.78	789	1.1	47823	1	1615	0.7	14527	0.5
200.79	819	1.1	44833	0.8	1486	0.7	14166	0.7
200.8	450	0.7	34526	0.6	1383	0.7	12963	0.7
200.81	598	0.8	36690	0.6	1377	1	13120	1.5
200.82	937	1.5	52093	0.7	1821	0.7	18044	0.5
200.83	1377	0.7	62419	1	2113	0.9	21619	0.8
200.84	1898	0.5	74438	0.9	2817	0.7	28195	0.5
200.85	1773	0.7	77508	1	2668	0.5	27279	1
200.86	1421	0.6	64655	1	2032	0.9	17953	0.9
200.87	1649	0.9	83330	0.9	2204	0.7	21748	1.6
200.88	1872	1	93468	1.3	2381	0.8	24045	0.8
200.89	2037	0.6	95605	0.5	2661	0.8	25221	1
200.9	1915	0.7	97318	0.6	2560	0.7	25702	0.7
200.91	1683	0.7	93687	0.6	2507	0.4	25603	1
200.92	1737	0.7	86659	0.6	2404	0.9	25451	0.5
200.93	1688	1	83944	0.7	2286	1.1	24778	1.2
200.94	1721	0.6	86532	1.2	2383	0.6	24600	0.5
200.95	1697	1.4	85349	1.2	2247	0.9	22597	0.8
200.96	1677	1.3	91209	0.4	2194	1	23487	1.4
200.97	1736	0.7	92641	1.3	2449	1.2	24187	1
200.98	1675	1.5	86647	0.6	2176	1.6	23242	0.6
200.99	1315	0.9	74454	0.8	1982	1.3	20314	0.6
201	1224	1	77606	0.9	1895	1.7	22106	1
201.01	1539	0.7	82628	1.4	2279	0.8	21822	0.6
201.02	1232	1.5	71008	0.5	1794	1	19813	0.8
201.03	804	0.6	52139	0.7	1297	1.4	15415	1.1
201.04	706	1.6	45597	0.8	1353	0.6	13648	0.8
201.05	1411	0.4	74630	1.4	2056	0.6	22305	0.7
201.06	1533	0.7	75250	1.6	2099	1.4	22648	1.2
201.07	1177	1.3	62248	1.3	1693	0.9	19503	0.6
201.08	1602	1.1	75728	0.7	2268	1	22772	0.3
201.09	1752	1.2	81234	0.5	2269	1.1	24818	1
201.1	1558	0.9	79704	0.5	2225	1.2	23156	0.8
201.11	1602	0.6	83190	0.8	2033	1.2	24690	0.7
201.12	1373	0.9	75975	0.9	1823	1.4	21026	0.8
201.13	1906	0.8	85513	1	1838	1.8	25082	1.5
201.14	1749	1.1	85663	1.1	2010	1.5	24298	1.1
201.15	1891	0.6	78543	1.9	1798	1.2	22236	0.7
201.16	1542	0.9	74788	0.6	1918	0.8	21123	0.8
201.17	1215	1.3	66384	0.8	1759	0.4	19263	0.5
201.18	1532	0.9	68422	0.8	1856	0.4	22537	1.2
201.19	1455	0.7	77658	0.8	2071	0.8	21645	0.5
201.2	1448	0.6	91165	0.4	1730	0.8	22078	1
201.21	1272	0.6	75797	0.4	1693	1.2	18253	1
201.22	859	0.6	68654	1.6	1497	0.8	15640	0.5
201.23	718	0.8	51189	0.7	874	0.7	8442	0.5
201.24	1293	1.2	99446	1.1	1609	0.7	16647	0.9
201.25	1457	1	99351	0.5	1682	1.1	17998	0.9
201.26	1456	0.8	103696	1	1698	1.9	18574	0.6
201.27	1572	1	104173	0.7	1510	2.1	19508	0.7
201.28	1065	1.3	78949	1.2	1591	1.1	15953	0.8
201.29	1070	0.9	75588	0.9	1710	0.8	16513	0.5
201.3	1253	1.8	82121	0.7	1747	1.2	16153	0.6
201.31	1383	0.9	83305	0.9	1819	0.5	16912	1.3
201.32	1407	1.4	91134	0.7	2028	1	19312	0.9
201.33	1095	0.6	76954	0.5	1774	0.9	16815	1
201.34	971	0.6	78325	0.9	1792	1.2	17365	1.2
201.35	1195	0.8	82679	0.9	1827	0.7	18416	0.9
201.36	1156	0.6	78578	0.9	1593	0.8	18491	0.6
201.37	1041	1.1	78597	0.7	1744	1.3	18687	1.4
201.38	1372	1.2	89758	0.6	1914	0.9	20760	1.3
201.39	1638	0.8	98494	1.1	2005	0.9	22783	1.4
201.4	1484	0.8	88622	1.1	1748	1.3	20431	0.8
201.41	1281	1.1	70571	0.9	1929	1	21659	0.6
201.42	1448	1.5	77377	1	2145	0.8	24095	1
201.43	1655	0.5	81580	1.7	2080	0.9	26058	0.8
201.44	1717	1.3	85328	1	2444	1	26379	1.2
201.45	862	1.2	56506	0.8	1717	1.1	18164	0.8
201.46	808	0.8	55770	0.5	1534	0.7	16998	0.7
201.47	1011	1.3	65275	0.6	1865	1	19360	1.3
201.48	954	0.6	56182	1.5	1631	1.5	17081	1
201.49	1101	1	70242	1	2031	1.5	20747	0.9
201.5	878	0.8	71818	1	1617	1.3	17633	1.4
201.54	1724	0.8	100035	1.2	2815	1.7	27630	0.8
201.55	901	0.5	54548	1.3	1464	1	15077	0.6
201.56	756	1.7	47462	0.7	1446	0.6	13353	1
201.57	1393	0.6	82591	0.6	2124	0.8	22096	0.9
201.58	1645	1.3	87442	1	2230	1	24215	0.6
201.59	1758	0.9	88884	0.5	2467	0.8	24980	1.2
201.6	1509	0.9	83161	0.7	2213	0.7	22386	0.9
201.61	498	1	34723	1.3	962	0.8	9747	0.8
201.62	1750	1.2	85212	0.8	2463	0.6	23286	0.5
201.63	1354	1.3	73634	1.3	2043	0.7	20160	0.6
201.64	1279	0.7	77385	0.9	2228	0.6	21338	1.2
201.65	1473	1	77559	1.1	2377	0.7	22714	1.6
201.66	1679	1	78901	0.5	2282	0.9	23791	0.7
201.67	1932	0.5	80789	0.6	2548	1	27198	1.2
201.68	1836	0.6	77797	0.7	2596	1.2	26208	1.2
201.69	1851	1.3	81247	1.1	2582	0.7	26588	0.9
201.7	1920	1.1	77489	0.5	2788	0.6	27671	1.3
201.71	1007	0.6	54970	1	1398	0.7	13758	0.7
201.72	1753	0.8	87020	1.3	2407	1.4	24501	1
201.73	1792	1.4	89209	0.5	2524	0.6	26084	0.9
201.74	1946	1.2	77963	0.9	2647	1.6	26282	1.4
201.75	2020	0.5	75735	0.9	2761	0.3	27760	0.7
201.76	1346	0.9	70012	0.6	2153	1	20497	1
201.77	1230	0.8	99607	1	1642	1	16628	0.9
201.78	1070	1.2	87956	1	1191	0.9	13975	0.6
201.79	1362	0.6	119661	0.9	1771	0.6	17880	1
201.8	1397	1.1	115425	0.4	1795	0.9	18186	0.7
201.81	1435	1	118916	1.3	1673	0.7	18179	0.8
201.82	1447	1.2	117766	0.7	1800	1	18805	0.7
201.83	1470	0.9	111571	0.8	2006	0.6	18538	1.1
201.84	1006	1.5	98511	0.6	1451	1.6	15663	0.6
201.85	1028	1.8	100289	0.5	1461	1.4	15577	0.7
201.86	1025	0.5	101274	1.3	1502	0.8	16540	0.7
201.87	1114	0.5	92331	0.5	1407	1.3	14233	2
201.88	475	0.4	69576	1.2	1091	0.8	10131	0.7
201.89	377	0.9	54051	0.5	1014	0.7	8007	1.7
201.9	58	0.7	18846	1.6	306	0.7	2521	0.8
201.91	1077	0.6	96100	1.1	1297	0.7	13765	1.3
201.92	1424	1.3	128922	1	1866	0.8	18878	1.3
201.93	1405	0.7	126963	0.9	1570	1.2	18192	0.6
201.94	1357	0.7	123948	0.7	1645	0.8	17451	0.9
201.95	1335	0.4	127739	0.9	1623	1.5	17248	1.2
201.96	1297	0.6	128472	0.8	1657	1.7	17169	0.9
201.97	1078	0.6	132075	1.2	1555	1.1	17724	0.8
201.98	624	1	93117	0.9	1224	0.8	12231	1.7
201.99	111	0.6	21100	0.9	267	0.5	2825	0.8
202	387	0.5	49922	0.8	556	1	6995	0.5
202.01	1018	1	114438	2.2	1618	0.8	15373	1.2
202.02	834	0.5	100393	0.7	1294	0.5	13762	1.4
202.03	669	1.2	84447	1	1133	0.9	11781	0.5
202.04	303	0.7	46785	0.9	588	0.6	6841	0.8
202.05	434	0.5	65056	0.4	1027	0.8	8982	0.9
202.06	889	0.9	110654	0.9	1176	0.8	13449	0.7
202.07	755	0.5	124702	0.3	1451	0.6	16356	1
202.08	869	0.9	117365	0.5	1317	0.7	15363	0.7
202.09	648	1.1	111908	0.6	1260	0.9	14753	1.2
202.1	735	0.9	103488	0.8	1312	0.8	14350	0.6
202.11	487	0.7	93090	0.9	1229	0.7	12814	1.1
202.12	381	0.6	59767	0.5	809	0.4	7685	1.1
202.13	967	0.7	113081	0.7	1089	0.8	15103	0.8
202.14	864	1.2	127076	1.2	1385	1.6	16600	1
202.15	1176	0.5	133441	0.8	1724	1.1	17152	1.3
202.16	1113	0.6	144183	0.7	1694	0.7	16958	0.8
202.17	1184	0.6	143935	1.8	1680	1.2	17874	0.6
202.18	1190	1.2	132291	0.5	1560	0.9	16737	0.6
202.19	1022	0.9	129027	1.4	1318	1.6	16043	0.9
202.2	874	0.7	113120	1.3	1154	1.2	14453	0.5
202.21	1147	0.9	133730	1.2	1420	1.6	15654	1.1
202.22	1131	0.8	134197	0.9	1473	0.8	15904	0.4
202.23	1084	0.4	133795	0.7	1483	0.7	16134	0.5
202.24	1036	0.9	132742	1.1	1352	0.6	16844	0.7
202.25	1254	0.9	131052	0.5	1506	1.1	17327	0.7
202.26	1240	0.9	131470	0.9	1515	0.6	16845	1.8
202.27	1233	0.8	131199	1.4	1657	1.3	17521	0.7
202.28	1189	0.7	130038	1.8	1500	0.6	16420	0.7
202.29	1306	1.3	126634	1.3	1538	1	16530	0.7
202.3	1211	0.7	125331	0.8	1526	1.2	17752	1.2
202.31	1291	0.9	128704	1.4	1430	0.9	16809	0.8
202.32	1157	0.7	130928	0.7	1425	0.6	16337	0.7
202.33	1005	0.6	109103	1.2	1119	1	14000	0.6
202.34	691	0.5	95668	0.6	1146	0.8	12242	0.5
202.35	988	0.5	126674	0.8	1434	1.8	15935	0.6
202.36	1171	0.3	127751	1.1	1622	1.9	16204	1
202.37	1217	0.7	126487	0.7	1490	0.9	16812	0.7
202.38	1279	1.3	126602	0.7	1476	1.4	16673	0.7
202.39	1300	1.4	127920	0.5	1619	0.5	15845	0.6
202.4	1218	0.7	131086	0.8	1428	0.9	16244	0.7
202.41	1121	0.7	128397	1.1	1663	0.5	15331	0.6
202.42	897	0.9	117487	1.2	1300	1.6	14352	0.8
202.43	1021	0.5	119116	0.5	1407	0.8	15125	1
202.44	1146	1.5	105533	0.7	1354	1.5	16242	0.6
202.45	1169	0.7	114510	1	1348	1.2	17296	0.8
202.46	1206	0.5	129474	1.3	1412	1.7	18546	1
202.47	1397	1	119784	1.3	1717	0.7	20238	1.3
202.48	1636	0.6	87705	0.8	1769	0.8	25144	0.4
202.49	1524	1.2	84282	0.8	1945	0.8	22791	1.2
202.5	1734	0.8	89627	0.9	1719	1.5	24093	0.8
202.51	1238	1	76980	1.2	1686	0.9	21726	0.6
202.52	875	0.7	85748	0.5	1014	0.9	13824	0.8
202.53	876	0.7	113379	1.2	777	1.2	17612	0.7
202.54	857	0.7	135170	2.5	489	2.3	15331	0.8
202.55	791	0.7	122304	0.8	787	1.4	15233	1
202.56	717	0.8	109776	0.9	650	0.5	10623	1
202.57	567	0.4	71373	0.8	486	0.4	6598	0.5
202.58	807	1	164891	1.1	415	2.7	14993	0.8
202.59	1065	0.7	168704	0.9	823	1	12851	1.2
202.6	810	1	164932	1.1	825	0.7	12790	0.5
202.61	779	0.7	155184	0.6	752	1	12518	1.1
202.62	443	0.9	139281	0.7	557	2.2	12139	1.3
202.63	426	0.4	159454	1.2	664	2.2	8105	0.7
202.64	597	0.5	160432	0.9	540	0.8	10848	0.6
202.65	722	0.6	162747	0.8	520	0.9	11605	0.8
202.66	509	0.6	162919	0.8	391	0.7	10199	1
202.67	223	0.7	67975	0.8	368	0.7	4662	0.5
202.68	587	0.6	140278	0.8	488	0.8	9921	0.9
202.69	674	0.9	149898	0.7	515	1.8	11182	0.7
202.7	898	1	157354	1.6	809	1.5	12265	0.9
202.71	820	0.7	176792	0.8	762	0.6	12337	0.7
202.72	791	0.9	179622	0.6	654	0.7	12336	0.8
202.73	855	0.8	177138	1.2	783	1	11458	1.1
202.74	839	0.7	184857	0.7	726	0.4	11223	1
202.75	772	0.8	172655	0.8	464	0.9	11905	1.1
202.76	717	0.7	179121	0.6	438	1.1	11953	1.3
202.77	780	0.4	186716	0.9	595	0.7	10659	1.3
202.78	878	0.9	181884	1	512	1	10759	0.9
202.79	807	1.1	189682	1.4	546	0.7	11401	1.1
202.8	636	0.9	173311	1.2	302	2.3	11968	1.2
202.81	620	1	185292	1.6	428	2.2	11645	0.9
202.82	630	1.1	186582	1.7	520	0.8	11262	1.7
202.83	679	0.9	180966	0.6	589	1.2	11391	0.6
202.84	734	0.9	183896	0.6	635	0.9	11511	0.9
202.85	774	1.2	188231	0.9	654	0.5	11367	1.5
202.86	806	1.1	182991	0.8	724	1.2	12553	0.7
202.87	657	1.3	170985	0.9	526	0.9	12643	1.3
202.88	693	0.4	182521	1.1	631	0.5	10647	1.3
202.89	652	0.7	182292	0.6	699	0.9	10534	1.1
202.9	679	0.4	185812	0.9	567	0.8	10866	1
202.91	621	0.6	193169	0.5	499	0.6	9897	0.8
202.92	542	0.5	195800	0.6	647	1.1	9489	1.3
202.93	592	0.7	185417	0.9	455	0.7	10432	1.1
202.94	590	1	183869	0.9	539	0.6	10233	0.8
202.95	640	0.7	196435	0.5	526	0.5	9919	1.6
202.96	628	0.6	195836	0.6	653	0.6	9994	0.7
202.97	487	0.5	185006	1	510	0.9	10312	1.1
203.03	209	0.3	123798	0.7	528	0.9	5940	1.5
203.04	599	1	196558	0.6	476	1.1	8350	1.5
203.05	524	0.5	200730	1	533	0.8	8422	1.7
203.06	615	0.9	200680	0.9	464	0.9	8254	1.4
203.07	538	0.8	212582	0.7	561	0.7	7793	1.3
203.08	430	0.8	200303	1.1	410	0.5	7722	1
203.09	512	1	195339	1	406	0.9	7638	1.1
203.1	574	0.3	192697	1	379	0.5	8626	0.7
203.11	565	0.8	204188	1.2	605	0.5	8331	0.7
203.12	628	1.7	199653	0.7	478	0.5	8580	1
203.13	625	0.6	195924	0.6	378	0.6	8198	1.1
203.14	482	0.9	194937	1.2	500	0.7	8060	1.4
203.15	492	0.4	198664	1	432	0.7	7227	1.3
203.16	514	0.4	199825	0.6	410	0.8	7437	1
203.17	526	1	205846	1	321	0.5	7028	1.6
203.18	493	1.2	200149	0.4	455	0.9	7817	0.7
203.19	520	0.9	205748	0.7	358	0.7	6786	0.8
203.2	625	0.5	204447	0.7	432	0.5	7305	0.9
203.21	453	0.4	212289	0.8	318	0.6	6626	1.2
203.22	471	1.4	205398	1.5	347	0.6	6741	0.6
203.23	521	0.8	202655	1.2	375	0.3	7276	0.7
203.24	511	0.5	198348	0.9	339	0.8	6874	0.9
203.25	527	1.2	198621	1.3	357	0.4	7931	1.2
203.26	484	1.1	199692	0.8	350	0.6	7861	0.7
203.27	516	0.7	195194	0.7	431	0.8	7831	1
203.28	578	1	195885	0.6	620	0.7	9425	1
203.29	624	0.8	184776	0.8	493	1.3	9780	0.9
203.3	43	0.4	40543	0.9	107	0.6	2198	0.6
203.31	125	0.6	64937	1.2	269	0.4	3327	1.1
203.32	211	0.6	107699	1.5	243	0.6	5401	0.6
203.33	434	0.5	162596	0.8	436	0.2	7440	0.6
203.34	706	1.1	204214	1.4	597	0.8	9138	0.9
203.35	423	0.9	162712	1.3	414	0.7	7171	1.1
203.36	350	0.5	158057	0.9	323	0.7	7159	1
203.37	210	0.3	93485	0.5	209	0.6	4086	1
203.38	485	0.8	154221	1.2	423	0.3	6664	0.9
203.39	654	0.5	186718	1	432	0.3	8323	1.3
203.4	389	0.7	157473	1.5	361	1	6989	0.8
203.41	394	0.4	158209	0.6	441	1.2	6596	0.7
203.42	503	1	182656	0.8	436	0.7	7467	1.5
203.43	564	0.7	197920	0.8	402	0.8	7898	0.9
203.44	75	0.6	33413	1.2	88	0.2	1334	1.2
203.45	61	0.6	66401	0.8	166	0.7	2506	0.9
203.46	128	0.6	87627	1.5	223	0.7	3487	1
203.47	485	0.8	183074	1.3	356	0.7	7015	1.1
203.48	546	0.5	190089	0.5	410	0.6	7044	0.8
203.49	426	0.9	191179	1.1	412	0.4	7542	0.8
203.5	445	0.7	189453	1.3	397	0.8	7467	0.8
203.51	361	1.3	187565	0.7	256	0.6	7473	1.6
203.52	388	0.4	191938	0.7	398	0.6	7237	1.1
203.53	443	0.9	191635	1.1	328	0.6	7376	0.5
203.54	472	1.1	187271	1.7	367	0.7	7507	0.8
203.55	421	0.4	189115	0.7	339	0.4	7472	1.2
203.56	270	0.7	187721	0.8	399	0.6	7492	0.5
203.57	340	0.3	182294	2.1	392	0.1	7556	1.2
203.58	464	0.4	179556	0.9	373	0.6	8403	1.5
203.59	398	0.8	178291	0.9	310	0.6	7799	0.9
203.6	425	0.8	177839	0.5	352	0.7	8035	1
203.61	744	0.9	189188	0.8	456	0.6	8722	0.9
203.62	272	0.6	133630	0.9	468	0.8	5988	0.8
203.63	245	0.7	135820	0.6	338	0.4	5853	0.6
203.64	263	0.4	135937	1.3	322	0.5	5921	1.1
203.65	334	0.7	138831	0.7	374	0.6	6618	0.3
203.66	649	0.7	198075	0.9	431	0.7	9339	0.8
203.67	727	1.5	201558	0.7	535	0.4	9088	1.1
203.68	621	0.9	202864	0.5	436	0.5	9156	0.5
203.69	633	0.7	206720	1	411	0.4	8326	0.7
203.7	513	0.7	201694	0.7	465	0.4	8594	1.5
203.71	525	0.8	202826	1.5	460	0.6	8329	1.2
203.72	574	0.5	204330	1	689	0.9	8199	1.6
203.73	503	1	205472	1.2	534	0.7	7489	1
203.74	482	1	213060	0.6	400	0.9	7744	1.1
203.75	418	1	212709	0.8	480	0.5	7476	1.1
203.76	450	0.5	203361	1.3	433	0.8	7969	0.8
203.77	516	0.7	213795	0.8	342	0.8	7931	1.4
203.78	415	0.7	207022	0.9	476	0.8	8166	0.9
203.79	525	0.7	213746	0.7	472	0.7	8314	1.2
203.8	582	0.7	213015	0.7	438	0.9	8174	1.4
203.81	446	0.8	205876	0.9	387	0.3	8123	1.3
203.82	582	0.9	211147	0.8	389	0.8	8019	1
203.83	424	1.1	207416	0.8	457	0.7	7686	1.5
203.84	607	1.3	210853	0.7	501	0.4	7759	1
203.85	421	0.8	205081	0.7	467	0.9	7735	1.1
203.86	519	1.2	208985	0.5	454	0.6	7745	1.3
203.87	491	0.6	194295	1	515	0.4	9195	2
203.88	540	1.3	201377	1.6	386	0.5	8637	0.9
203.89	455	0.5	197094	1	535	0.4	8815	0.7
203.9	354	0.7	193838	0.5	288	0.5	8794	1.5
203.91	468	1	195906	1.2	483	0.6	8839	1.5
203.92	457	0.7	189598	0.9	481	0.5	8937	1.2
203.93	640	0.9	197018	1.2	525	0.6	9037	0.7
203.94	416	0.7	192010	0.9	470	0.6	8765	1.2
203.95	668	1.1	195282	1.2	518	0.8	8418	1
203.96	608	1	193448	0.8	540	0.6	8860	0.8
203.97	552	0.4	190368	0.8	509	0.8	8587	1
203.98	507	0.6	184094	1.1	334	1.1	9004	1.4
203.99	727	0.6	187040	1.1	520	0.7	8814	0.9
204	538	0.9	180674	1.1	330	0.6	8593	0.9
204.01	464	1	177682	0.8	304	0.7	8254	0.8
204.02	565	0.5	177211	0.6	381	0.7	8466	0.9
204.03	618	0.8	160204	1.3	408	0.6	8307	0.7
204.04	514	0.9	174545	0.6	350	0.6	8341	0.5
204.05	653	0.5	165701	0.6	278	0.8	8253	0.8
204.06	579	0.3	160121	1.2	469	0.2	8159	0.6
204.07	349	1	163204	1	302	1.7	7799	0.8
204.08	246	1.3	104433	1.1	254	0.3	4992	0.6
204.09	2	0.5	11301	1.2	70	0.3	626	0.9
204.1	35	1	42999	0.4	103	0.4	1801	0.5
204.11	52	0.6	17757	0.7	67	0.6	559	0.8
204.12	400	1	150197	0.9	237	0.3	5430	0.6
204.13	534	0.6	184435	0.9	402	0.6	6865	0.7
204.14	564	0.8	185156	0.7	205	1.2	7460	1.4
204.15	653	0.7	185857	1.6	297	0.7	7253	1
204.16	603	1	197701	0.6	403	0.3	7858	0.8
204.17	546	0.4	202667	0.8	329	0.4	8288	0.6
204.18	514	0.9	209719	0.7	250	0.7	7877	1.2
204.19	521	0.4	210914	0.8	476	0.8	7509	1.2
204.2	492	0.6	213604	1	437	0.8	7973	1.8
204.21	589	0.6	214834	1	395	0.6	7596	0.8
204.22	507	0.5	211593	1	360	1.1	8181	0.7
204.23	548	0.5	214486	0.8	311	0.9	7836	0.8
204.24	600	0.8	208082	1.2	434	0.4	7888	1.1
204.25	729	0.8	203521	1	411	0.5	7463	0.7
204.26	585	0.9	214197	1	475	0.5	8122	1.2
204.27	573	0.9	214227	0.8	339	0.6	8596	1.4
204.28	414	0.4	212952	1.2	376	0.3	9030	1.1
204.29	472	0.8	208779	2.2	339	0.7	8947	1.6
204.3	432	0.9	216092	0.9	314	1.1	9497	1.6

## Sheet: CaCO3
Suppl. table 2: CaCO3
[mbsf]	CaCO3 [wt%]
192.43	69.4886
192.9	76.6293
192.9	87.1702
193.3	70.9032
193.53	64.5378
193.53	65.5427
193.93	66.4635
193.93	68.0741
194.43	67.8746
194.43	68.7814
194.8	63.0322
194.8	64.5378
195.05	44.7344
195.05	45.2738
195.45	43.3199
195.45	45.9538
195.51	58.6
195.88	44.0272
195.88	45.6314
196.35	46.1489
198.8	40.3657
198.9	36.9545
199.19	39.2
199.5	36.9935
199.58	31.2964
199.75	43.3905
200.37	34.1255
200.6	36.5885
200.9	36.7021
201.04	32.7109
201.07	41.3706
201.13	42.1865
201.22	44.9682
201.48	43.0205
201.59	39.4534
201.74	40.4
201.82	48.0268
201.85	46.1489
201.88	44.6117
201.96	52.9595
201.98	48.9187
202	54.3408
202.06	52.6142
202.16	53.4294
202.34	65.3459
202.51	34.1255
202.7	69.6269
202.85	73.9974
202.94	72.0207
203.17	77.6664
203.24	81.0499
203.31	77.3768
203.38	72.1295
203.38	77.2685
203.8	76.0553
204.1	66.0675
204.1	69.4886
204.15	75.3754

## Sheet: isotopes forams
Suppl. table 4: stable isotope data, rel. temperature changes
Nuttallides truempyi						Subbotina patagonica						Morozovella subbotinae						Acarinina soldadoensis
[mbsf]	δ13C [‰, VPDB]	δ18O [‰, VPDB]	source/lab	ΔBWT [°C]		[mbsf]	δ13C [‰, VPDB]	δ18O [‰, VPDB]	source/lab	ΔTWT [°C]		[mbsf]	δ13C [‰, VPDB]	δ18O [‰, VPDB]	source/lab	ΔSST [°C]		[mbsf]	δ13C [‰, VPDB]	δ18O [‰, VPDB]	source/lab
192.43	0.157	-0.598	Leipzig_Erlangen			192.43	1.214	-0.874	Leipzig_Erlangen			192.43	2.242	-1.603	Leipzig_Erlangen			192.9	1.665	-0.95	Leipzig, Erlangen
192.43	-0.061	-0.581	Leuven_Erlangen			192.9	0.952	-0.478	Leipzig_Erlangen			192.9	3.24	-1.408	Leipzig_Erlangen			199.18	3.93	-2.451	SIO
192.9	0.465	-0.415	Leipzig_Erlangen			193.53	1.133	-0.305	Leipzig_Erlangen			193.3	3.246	-1.131	Leipzig_Erlangen			199.31	3.441	-2.382	SIO
192.9	0.371	-0.245	Leuven_Erlangen			193.53	1.328	-0.225	Leipzig_Erlangen			193.93	3.28	-1.329	Leipzig_Erlangen			199.41	3.805	-2.353	SIO
193.3	0.67	0.02	Leipzig_Erlangen			193.53	1.351	-1.14	Leipzig_Erlangen			194.8	3.186	-1.504	Leipzig_Erlangen			199.6	2.911	-1.977	SIO
193.3	0.545	0	Leuven_Erlangen			193.93	1.25	-0.499	Leipzig_Erlangen			195.05	3.656	-1.303	Leipzig_Erlangen			199.7	3.081	-2.092	SIO
193.53	0.546	-0.013	Leipzig_Erlangen			194.8	0.553	-0.68	Leipzig_Erlangen			195.45	4.171	-1.938	Leipzig_Erlangen			199.78	3.661	-2.559	SIO
193.53	0.5295	-0.009	Leuven_Erlangen			194.8	0.886	-0.824	Leipzig_Erlangen			195.88	3.744	-1.969	Leipzig_Erlangen			199.88	2.793	-1.593	SIO
193.53	0.55	-0.01	Leuven_Erlangen			194.8	1.273	-0.448	Leipzig_Erlangen			196.35	3.926	-1.717	Leipzig_Erlangen			199.98	2.969	-1.939	SIO
193.53	0.62	0.047	Leuven_Erlangen			195.05	1.331	-0.917	Leipzig_Erlangen			198.9	4.589	-2.363	Leipzig_Erlangen	1.90819		200.21	3.662	-2.268	SIO
193.93	0.293	0.227	Leipzig_Erlangen			195.45	1.541	-0.941	Leipzig_Erlangen			199.18	4.648	-2.522	SIO	2.64378		200.31	3.04	-1.783	SIO
194.43	0.563	-0.025	Leipzig_Erlangen			195.88	1.238	-1.348	Leipzig_Erlangen			199.31	4.726	-2.532	SIO	2.6901		200.37	2.317	-1.407	Leipzig, Erlangen
194.8	0.13	-0.71	Leuven_Erlangen			195.88	1.611	-1.252	Leipzig_Erlangen			199.41	4.548	-2.672	SIO	3.33912		200.4	3.208	-2.282	SIO
194.8	0.48	-0.12	Leuven_Erlangen			196.35	1.631	-1.089	Leipzig_Erlangen			199.51	4.199	-2.619	SIO	3.09328		200.63	3.608	-2.38	SIO
194.8	0.53	-0.18	Leuven_Erlangen			198.9	1.357	-1.419	Leipzig_Erlangen	2.31367		199.58	4.614	-2.549	Leipzig_Erlangen	2.76884		200.83	3.515	-2.252	SIO
195.45	0.797	0.031	Leipzig_Erlangen			199.18	1.841	-1.841	SIO	4.23099		199.6	4.322	-2.56	SIO	2.81981		200.91	3.853	-2.166	SIO
195.88	0.782	-0.148	Leuven_Erlangen			199.31	1.643	-2.078	SIO	5.31246		199.7	4.54	-2.276	SIO	1.50634		201	3.019	-2.031	SIO
196.35	0.898	-0.085	Leipzig_Erlangen			199.41	1.603	-1.875	SIO	4.38593		199.78	4.175	-2.313	SIO	1.67719		201.1	3.283	-1.833	SIO
198.54	0.511	-0.562	Nunes_Norris_06	1.808		199.51	1.468	-1.625	SIO	3.24828		199.88	4.18	-2.288	SIO	1.56174		201.2	3.422	-1.808	SIO
198.69	0.39	-0.613	Nunes_Norris_06	2.012		199.58	1.481	-1.407	Leipzig_Erlangen	2.25931		199.98	4.544	-2.626	SIO	3.12574		201.29	2.964	-1.813	SIO
198.8	0.483	-0.609	Nunes_Norris_06	1.996		199.6	1.493	-1.798	SIO	4.03513		200.05	2.845	-2.863	Leipzig_Erlangen	4.22648		201.4	2.925	-2.041	SIO
198.9	0.69	-0.41	Leuven_Erlangen	1.2		199.7	1.875	-1.643	SIO	3.33007		200.08	4.438	-2.384	SIO	2.00526		201.48	3.267	-2.037	SIO
198.95	0.633	-0.501	Nunes_Norris_06	1.564		199.78	1.44	-1.889	SIO	4.44975		200.21	4.248	-2.369	SIO	1.93592		201.66	2.492	-1.538	SIO
199.06	0.609	-0.549	Nunes_Norris_06	1.756		199.88	1.646	-2.196	SIO	5.85217		200.31	4.569	-2.539	SIO	2.72252		201.71	3.302	-2.44	SIO
199.31	0.708	-0.48	Nunes_Norris_06	1.48		199.98	1.457	-1.635	SIO	3.29371		200.37	3.545	-1.869	Leipzig_Erlangen	-0.367547		201.81	2.589	-1.909	SIO
199.41	0.458	-0.829	Nunes_Norris_06	2.876		200.08	1.404	-1.678	SIO	3.48915		200.37	4.497	-2.496	Leipzig_Erlangen	2.52339		201.87	2.893	-2.0136	SIO
199.51	0.623	-0.566	Nunes_Norris_06	1.824		200.21	1.464	-1.698	SIO	3.58009		200.4	4.832	-2.831	SIO	4.07766		202.02	2.105	-1.5405	SIO
199.6	0.599	-0.417	Nunes_Norris_06	1.228		200.31	1.573	-1.751	SIO	3.82119		200.63	4.494	-2.314	SIO	1.68181		202.08	2.322	-1.7156	SIO
199.7	0.647	-0.399	Nunes_Norris_06	1.156		200.37	1.507	-1.288	Leipzig_Erlangen	1.72066		200.83	4.5	-2.607	SIO	3.03764		202.13	2.257	-1.7006	SIO
199.78	0.638	-0.422	Nunes_Norris_06	1.248		200.4	1.483	-1.761	SIO	3.8667		200.91	4.648	-2.149	SIO	0.920548		202.18	1.942	-1.5786	SIO
199.88	0.703	-0.307	Nunes_Norris_06	0.788		200.5	1.362	-1.812	SIO	4.09889		201	4.266	-2.461	SIO	2.3614		202.24	2.029	-1.5855	SIO
199.98	0.656	-0.289	Nunes_Norris_06	0.716		200.63	1.488	-1.614	SIO	3.19831		201.04	4.452	-2.021	Leipzig_Erlangen	0.331121		202.29	1.489	-1.538	Leipzig, Erlangen
200.08	0.673	-0.341	Nunes_Norris_06	0.924		200.83	1.51	-1.65	SIO	3.36188		201.1	4.677	-2.237	SIO	1.32635		202.292	1.963	-1.5844	SIO
200.21	0.424	-0.548	Nunes_Norris_06	1.752		200.91	1.637	-1.489	SIO	2.63097		201.2	4.652	-2.531	SIO	2.68546		202.34	1.861	-1.5254	SIO
200.31	0.637	-0.403	Nunes_Norris_06	1.172		201	1.603	-1.507	SIO	2.71261		201.29	3.751	-2.103	SIO	0.708609		202.4	2.112	-1.6006	SIO
200.37	0.89	-0.11	Leuven_Erlangen	0		201.04	1.568	-1.38	Leipzig_Erlangen	2.13702		201.4	4.621	-2.527	SIO	2.66694		202.48	0.867	-2.478	Leipzig, Erlangen
200.4	0.53	-0.47	Nunes_Norris_06	1.44		201.1	1.418	-1.392	SIO	2.19137		201.48	4.817	-2.5	SIO	2.54191		202.51	4.008	-2.266	Leipzig, Erlangen
200.5	0.567	-0.477	Nunes_Norris_06	1.468		201.2	1.522	-1.508	SIO	2.71715		201.56	4.011	-2.226	SIO	1.2756		202.53	3.543	-1.215	Leipzig, Erlangen
200.63	0.643	-0.496	Nunes_Norris_06	1.544		201.29	1.483	-1.339	SIO	1.95141		201.66	4.176	-2.601	SIO	3.00983		202.535	3.827	-1.7026	SIO
200.72	0.709	-0.339	Nunes_Norris_06	0.916		201.4	1.264	-1.319	SIO	1.8609		201.71	3.499	-2.221	SIO	1.25253		202.58	3.26	-1.5246	SIO
200.83	0.574	-0.971	Nunes_Norris_06	3.444		201.48	1.248	-1.494	SIO	2.65365		201.76	3.295	-2.461	SIO	2.3614		202.62	3.56	-1.6215	SIO
200.91	0.666	-0.358	Nunes_Norris_06	0.992		201.56	1.342	-1.58	SIO	3.0439		201.81	3.494	-2.709	SIO	3.51085		202.67	3.674	-2.1107	SIO
201	0.639	-0.449	Nunes_Norris_06	1.356		201.66	0.966	-1.571	SIO	3.00304		201.85	3.476	-2.331	Leipzig_Erlangen	1.76033		202.72	4.008	-1.8885	SIO
201.04	1.08	0.27	Leuven_Erlangen	-1.52		201.71	1.164	-1.7	SIO	3.58918		201.87	3.306	-2.4705	SIO	2.40536		202.83	4.089	-1.7175	SIO
201.2	0.453	-0.312	Nunes_Norris_06	0.808		201.76	1.176	-1.617	SIO	3.21194		201.92	3.088	-2.3756	SIO	1.96643		202.88	4.497	-1.8196	SIO
201.29	0.371	-0.455	Nunes_Norris_06	1.38		201.81	0.559	-1.58	SIO	3.0439		202.02	3.462	-2.4275	SIO	2.20641		202.93	4.299	-1.7456	SIO
201.4	0.213	-0.491	Nunes_Norris_06	1.524		201.85	0.743	-1.405	Leipzig_Erlangen	2.25025		202.08	3.151	-2.538	SIO	2.71789		202.98	4.418	-1.9977	SIO
201.48	0.502	-0.441	Nunes_Norris_06	1.324		201.87	0.67	-1.5326	SIO	2.82875		202.13	3.6	-2.736	SIO	3.63622		203.28	3.963	-1.615	Leipzig, Erlangen
201.56	0.084	-0.8	Nunes_Norris_06	2.76		201.92	0.682	-1.3455	SIO	1.98083		202.18	2.983	-2.354	SIO	1.8666		203.32	3.665	-1.311	Leipzig, Erlangen
201.61	0.155	-0.337	Nunes_Norris_06	0.908		202.02	0.64	-1.7227	SIO	3.69243		202.24	3.66	-2.705	SIO	3.49228		203.35	3.911	-1.232	Leipzig, Erlangen
201.66	0.134	-0.492	Nunes_Norris_06	1.528		202.08	0.53	-1.5414	SIO	2.86869		202.29	3.367	-2.614	Leipzig_Erlangen	3.0701		203.55	3.681	-1.022	Leipzig, Erlangen
201.71	0.06	-0.464	Nunes_Norris_06	1.416		202.13	0.492	-1.5674	SIO	2.9867		202.292	3.307	-2.519	SIO	2.62989		203.7	3.992	-0.894	Leipzig, Erlangen
201.76	-0.218	-0.73	Nunes_Norris_06	2.48		202.18	0.568	-1.6854	SIO	3.52279		202.34	3.626	-2.742	SIO	3.66408		203.9	3.884	-0.946	Leipzig, Erlangen
201.81	-0.209	-0.867	Nunes_Norris_06	3.028		202.24	0.476	-1.3935	SIO	2.19816		202.4	3.3837	-2.534	SIO	2.69936		204.2	3.871	-1.083	Leipzig, Erlangen
201.87	-0.339	-1.055	Nunes_Norris_06	3.78		202.29	0.395	-1.642	Leipzig_Erlangen	3.32552		202.46	1.4679	-2.03262	Leipzig	0.384587
201.92	-0.165	-0.867	Nunes_Norris_06	3.028		202.29	0.658	-1.6214	SIO	3.23193		202.48	1.64058	-2.4656	Leipzig	2.3827
201.97	-0.254	-0.735	Nunes_Norris_06	2.5		202.34	0.604	-1.6146	SIO	3.20104		202.48	4.57112	-2.4205	Leipzig	2.17404
202.02	-0.73	-1.262	Nunes_Norris_06	4.608		202.4	0.511	-1.6565	SIO	3.39142		202.51	4.2617	-2.55481	Leipzig	2.79574
202.08	-0.355	-0.934	Nunes_Norris_06	3.296		202.46	-0.724024	-2.62497	Leipzig	7.82122		202.51	4.7	-2.104	Leipzig_Erlangen	0.713215
202.13	-0.564	-1.094	Nunes_Norris_06	3.936		202.48	0.149351	-2.22205	Leipzig	5.97143		202.53	4.523	-1.853	Leipzig_Erlangen	-0.441011
202.18	-0.276	-0.844	Nunes_Norris_06	2.936		202.48	1.57669	-1.75699	Leipzig	3.84846		202.535	4.261	-1.829	SIO	-0.551177
202.34	-0.292	-0.894	Nunes_Norris_06	3.136		202.48	-0.338	-2.241	Leipzig_Erlangen	6.05821		202.58	4.873	-2.168	SIO	1.00812
202.4	-0.364	-0.981	Nunes_Norris_06	3.484		202.51	1.76435	-1.48838	Leipzig	2.62817		202.62	4.301	-1.949	SIO	0
202.48	-0.15	-0.67	Leuven_Erlangen	2.24		202.51	1.784	-1.441	Leipzig_Erlangen	2.41337		202.67	4.132	-1.739	SIO	-0.963992
202.51	0.78	-0.38	Leuven_Erlangen	1.08		202.53	1.81	-0.76	Leipzig_Erlangen	-0.659055		202.72	4.485	-1.835	SIO	-0.523638
202.58	0.716	-0.293	Nunes_Norris_06	0.732		202.535	1.952	-1.0085	SIO	0.458861		202.83	4.635	-1.823	SIO	-0.578713
202.62	0.881	-0.11	Nunes_Norris_06	0		202.58	1.654	-0.89065	SIO	-0.0717673		202.88	4.753	-1.887	SIO	-0.284883
202.72	1.008	-0.1	Nunes_Norris_06	-0.04		202.62	1.618	-0.9066	SIO	0		202.93	5.079	-2.007	SIO	0.266712
202.77	1.088	-0.134	Nunes_Norris_06	0.096		202.67	1.764	-1.0147	SIO	0.4868		202.98	5.052	-1.722	SIO	-1.04191
202.83	0.896	-0.343	Nunes_Norris_06	0.932		202.72	2.17	-0.9096	SIO	0.0135003		203.22	3.99	-1.348	Leipzig_Erlangen	-2.7518
202.88	0.966	-0.252	Nunes_Norris_06	0.568		202.83	1.98	-0.8986	SIO	-0.035998		203.32	4.092	-1.465	Leipzig_Erlangen	-2.21779
202.93	0.904	-0.139	Nunes_Norris_06	0.116		202.88	2.096	-0.9227	SIO	0.0724577		203.38	4.33356	-1.5385	Leipzig	-1.88192
202.98	1.073	-0.123	Nunes_Norris_06	0.052		202.93	2.136	-0.79961	SIO	-0.481111		203.38	3.366	-0.923	Leipzig_Erlangen	-4.68467
203.32	0.872	-0.002	Leipzig_Erlangen	-0.432		202.98	2.152	-0.62747	SIO	-1.25375		203.38	4.522	-0.904	Leipzig_Erlangen	-4.77083
203.35	0.958	-0.062	Leipzig_Erlangen	-0.192		203.22	2.016	-0.456	Leipzig_Erlangen	-2.02161		203.39	4.856	-1.495	Leipzig_Erlangen	-2.08074
203.39	0.85	0.27	Leipzig_Erlangen			203.28	2.024	-0.737	Leipzig_Erlangen	-0.762336		203.55	4.641	-1.327	Leipzig_Erlangen	-2.84757
						203.35	2.069	-0.765	Leipzig_Erlangen	-0.636598		203.7	4.778	-1.472	Leipzig_Erlangen	-2.18582
						203.38	2.2	-0.474	Leipzig_Erlangen	-1.94108		203.9	4.751	-1.362	Leipzig_Erlangen	-2.68795
						203.39	2.046	-0.394	Leipzig_Erlangen	-2.29882
						203.55	2.127	-0.334	Leipzig_Erlangen	-2.56686
						203.7	2.523	-0.413	Leipzig_Erlangen	-2.21389

## Sheet: Mg-Ca forams
Suppl. table 5: Mg/Ca, rel. temperature changes
Site	core-sec	cm	mbsf	Species	Mg/Ca	ΔT [°C]	T calc. following	Sr/Ca
401	14R-1	30-32	198.8	O. umbonatus	3.263	1.39843	Rathmann and Kuhnert, 2008	1.049
401	14R-1	91-93	199.41	O. umbonatus	3.257	1.37421	Rathmann and Kuhnert, 2008	1.058
401	14R-1	138-140	199.88	O. umbonatus	3.02	0.380134	Rathmann and Kuhnert, 2008	1.05
401	14R-2	8-10	200.08	O. umbonatus	3.072	0.604765	Rathmann and Kuhnert, 2008	1.039
401	14R-2	50-52	200.5	O. umbonatus	3.273	1.43869	Rathmann and Kuhnert, 2008	1.05
401	14R-2	100-102	201	O. umbonatus	3.006	0.318995	Rathmann and Kuhnert, 2008	1.042
401	14R-2	148-150	201.48	O. umbonatus	3.111	0.770757	Rathmann and Kuhnert, 2008	1.051
401	14R-3	11-13	201.61	O. umbonatus	3.216	1.20752	Rathmann and Kuhnert, 2008	1.061
401	14R-3	21-23	201.71	O. umbonatus	3.314	1.60249	Rathmann and Kuhnert, 2008	1.062
401	14R-3	47-49	201.97	O. umbonatus	3.083	0.651796	Rathmann and Kuhnert, 2008	1.055
401	14R-3	68-70	202.18	O. umbonatus	3.286	1.49085	Rathmann and Kuhnert, 2008	1.055
401	14R-3	79-80.5	202.29	O. umbonatus	3.142	0.901222	Rathmann and Kuhnert, 2008	1.052
401	14R-3	90-92	202.4	O. umbonatus	3.317	1.6144	Rathmann and Kuhnert, 2008	1.049
401	14R-3	112-114	202.62	O. umbonatus	2.934	0	Rathmann and Kuhnert, 2008	0.998
401	14R-3	138-140	202.88	O. umbonatus	2.674	-1.22094	Rathmann and Kuhnert, 2008	0.993
401	14R-3	148-150	202.98	O. umbonatus	2.446	-2.39359	Rathmann and Kuhnert, 2008	0.868
401	14R-1	30-32	198.8	S. patagonica	2.939	-0.442594	Elderfield and Ganssen, 2000	1.523
401	14R-1	91-93	199.41	S. patagonica	2.915	-0.52459	Elderfield and Ganssen, 2000	1.524
401	14R-1	138-140	199.88	S. patagonica	2.843	-0.77469	Elderfield and Ganssen, 2000	1.491
401	14R-2	8-10	200.08	S. patagonica	2.939	-0.442594	Elderfield and Ganssen, 2000	1.494
401	14R-2	50-52	200.5	S. patagonica	3.08	0.0260078	Elderfield and Ganssen, 2000	1.51
401	14R-2	100-102	201	S. patagonica	2.96	-0.371395	Elderfield and Ganssen, 2000	1.498
401	14R-2	100-102	201	S. patagonica	2.871	-0.676684	Elderfield and Ganssen, 2000	-
401	14R-2	148-150	201.48	S. patagonica	2.947	-0.415411	Elderfield and Ganssen, 2000	1.514
401	14R-3	11-13	201.61	S. patagonica	3.236	0.520092	Elderfield and Ganssen, 2000	1.556
401	14R-3	21-23	201.71	S. patagonica	2.899	-0.57963	Elderfield and Ganssen, 2000	1.563
401	14R-3	47-49	201.97	S. patagonica	3.356	0.88421	Elderfield and Ganssen, 2000	1.502
401	14R-3	68-70	202.18	S. patagonica	3.209	0.436305	Elderfield and Ganssen, 2000	1.544
401	14R-3	79-80.5	202.29	S. patagonica	3.331	0.809437	Elderfield and Ganssen, 2000	1.532
401	14R-3	90-92	202.4	S. patagonica	3.303	0.725023	Elderfield and Ganssen, 2000	1.543
401	14R-3	112-114	202.62	S. patagonica	3.072	0	Elderfield and Ganssen, 2000	1.294
401	14R-3	138-140	202.88	S. patagonica	3.062	-0.0326052	Elderfield and Ganssen, 2000	1.243
401	14R-3	148-150	202.98	S. patagonica	2.753	-1.09638	Elderfield and Ganssen, 2000	1.143
401	14R-4	39-40	203.39	S. patagonica	3.022	-0.1641	Elderfield and Ganssen, 2000	1.055
401	14R-1	30-32	198.8	M. subbotinae	3.603	0.0472946	Elderfield and Ganssen, 2000	1.356
401	14R-1	91-93	199.41	M. subbotinae	3.585	-0.00278901	Elderfield and Ganssen, 2000	1.348
401	14R-1	138-140	199.88	M. subbotinae	3.601	0.0417421	Elderfield and Ganssen, 2000	1.336
401	14R-2	8-10	200.08	M. subbotinae	3.683	0.266903	Elderfield and Ganssen, 2000	1.352
401	14R-2	50-52	200.5	M. subbotinae	3.548	-0.106533	Elderfield and Ganssen, 2000	1.348
401	14R-2	100-102	201	M. subbotinae	4.047	1.20938	Elderfield and Ganssen, 2000	1.361
401	14R-2	148-150	201.48	M. subbotinae	3.84	0.68435	Elderfield and Ganssen, 2000	1.399
401	14R-3	11-13	201.61	M. subbotinae	3.756	0.463172	Elderfield and Ganssen, 2000	1.38
401	14R-3	21-23	201.71	M. subbotinae	3.62	0.0943665	Elderfield and Ganssen, 2000	1.421
401	14R-3	21-23	201.71	M. subbotinae	3.596	0.0278474	Elderfield and Ganssen, 2000	-
401	14R-3	47-49	201.97	M. subbotinae	4.057	1.23406	Elderfield and Ganssen, 2000	1.396
401	14R-3	68-70	202.18	M. subbotinae	3.965	1.00468	Elderfield and Ganssen, 2000	1.4
401	14R-3	79-80.5	202.29	M. subbotinae	3.939	0.938895	Elderfield and Ganssen, 2000	1.409
401	14R-3	90-92	202.4	M. subbotinae	3.93	0.916021	Elderfield and Ganssen, 2000	1.437
401	14R-3	112-114	202.62	M. subbotinae	3.586	0	Elderfield and Ganssen, 2000	1.154
401	14R-3	138-140	202.88	M. subbotinae	3.433	-0.436029	Elderfield and Ganssen, 2000	1.059
401	14R-3	148-150	202.98	M. subbotinae	3.366	-0.633123	Elderfield and Ganssen, 2000	1.045
401	14R-4	39-40	203.39	M. subbotinae	3.447	-0.395331	Elderfield and Ganssen, 2000	1.004

## Sheet: clay mineralogy
Suppl. table 6: rel. abundance clay minerals
mbsf	Sm%	I%	K%	Chl%
192.04	49.4245	33.8425	14.5797	2.15326
192.43	48.7436	35.2282	13.0595	2.96866
194.43	51.2259	35.4049	10.138	3.23122
195.88	57.9428	26.9112	10.6168	4.52912
198.4	56.5714	28.3958	10.4598	4.57293
198.9	62.6125	27.4195	6.87246	3.09557
199.58	62.8911	27.3866	6.05943	3.66288
201.04	64.3341	28.0203	4.03382	3.61169
201.85	75.6386	22.0591	0.519012	1.78336
202.51	75.0361	24.3647	0.265192	0.333987
203.38	72.4632	26.991	0.190242	0.355581
204.1	80.0387	19.1624	0.231592	0.567297
204.9	77.0306	21.747	0.76757	0.454751

## Sheet: He isotopes
Suppl. table 3: He isotope data and rel ages
[mbsf]	NCF	3He [cm3 STP/g]	4He [cm3 STP/g]	3HeET [cm3 STP/g]		4Heterr [cm3 STP/g]		MAR [g/(cm2 k.y.)]				4He MAR [10-9 cm3 STP/(cm2 k.y.)]				DBD [g/cm3]		[mbsf]	rel. age model1 [k.y.]
192.9	0.2337	3.44572e-13	6.84085e-07	3.30303e-13	3.17261e-13	6.82715e-07	6.82769e-07	1.78926	1.86282	0.666054	0.693434	1221.56	1271.87	454.725	473.456	1.66		193.215	375.372	437.204	1006.68	1172.5
193.53	0.344573	1.91501e-12	8.81883e-07	1.89674e-12	1.88005e-12	8.74013e-07	8.74082e-07	0.311587	0.314354	0.115988	0.117018	272.331	274.771	101.375	102.284	1.66		193.73	279.139	337.476	748.601	905.049
193.93	0.335365	2.31013e-13	7.44101e-07	2.1548e-13	2.01283e-13	7.43207e-07	7.43266e-07	2.74271	2.93617	1.02097	1.09299	2038.4	2182.35	758.795	812.382	1.66		194.18	238.215	293.923	638.85	788.247
194.43	0.321254	3.32432e-13	7.4883e-07	3.16809e-13	3.02529e-13	7.47515e-07	7.47574e-07	1.86548	1.95353	0.694425	0.727203	1394.47	1460.41	519.093	543.639	1.66		194.615	204.209	257.839	547.651	691.476
194.8	0.369678	1.62828e-13	9.35252e-07	1.43294e-13	1.25439e-13	9.34657e-07	9.34731e-07	4.1244	4.71146	1.53531	1.75384	3854.9	4403.95	1434.99	1639.37	1.44		194.925	187.546	239.251	502.965	641.628
195.05	0.547262	8.02516e-13	1.03841e-06	7.80881e-13	7.61106e-13	1.03517e-06	1.03525e-06	0.756837	0.776501	0.281733	0.289053	783.453	803.872	291.641	299.242	1.44		195.25	174.405	224.476	467.721	602.004
195.45	0.540462	2.15847e-13	1.29416e-06	1.88815e-13	1.64108e-13	1.29338e-06	1.29348e-06	3.13004	3.60129	1.16516	1.34058	4048.32	4658.19	1506.99	1734.01	1.44		195.665	148.045	194.787	397.031	522.385
195.88	0.543686	3.12912e-13	1.44163e-06	2.82807e-13	2.55289e-13	1.44046e-06	1.44057e-06	2.08977	2.31502	0.777917	0.861768	3010.23	3334.96	1120.56	1241.44	1.44		197.34	127.078	171.022	340.8	458.651
198.8	0.596343	1.31589e-13	1.17012e-06	1.07143e-13	8.47981e-14	1.16967e-06	1.16976e-06	5.51602	6.96949	2.05334	2.5944	6451.92	8152.66	2401.73	3034.83	1.44		199.15	36.3477	60.2664	97.478	161.623
199.5	0.630065	6.14176e-14	1.25913e-06	3.51049e-14	1.10544e-14	1.25898e-06	1.25908e-06	16.8352	53.4629	6.26693	19.9016	21195.2	67314.1	7889.94	25057.7	1.44		199.625	33.0061	51.2314	88.5164	137.393
199.75	0.566095	9.81427e-14	1.38476e-06	6.92073e-14	4.27595e-14	1.38447e-06	1.38458e-06	8.53957	13.8215	3.17886	5.14506	11822.8	19136.9	4401.03	7123.74	1.44		200.175	31.9342	48.3892	85.6417	129.771
200.6	0.634115	1.38075e-13	1.16686e-06	1.13698e-13	9.1416e-14	1.16639e-06	1.16648e-06	5.198	6.46495	1.93496	2.40658	6062.87	7541.23	2256.91	2807.23	1.44		200.75	19.8466	30.5392	53.2249	81.9006
200.9	0.632979	9.48694e-14	1.40116e-06	6.55908e-14	3.88293e-14	1.40089e-06	1.401e-06	9.01041	15.2205	3.35413	5.66582	12622.6	21323.9	4698.77	7937.83	1.44		200.985	15.8556	24.448	42.5218	65.5651
201.07	0.586294	1.70167e-13	1.38932e-06	1.41142e-13	1.14613e-13	1.38874e-06	1.38885e-06	4.18727	5.15649	1.55871	1.91951	5815.02	7161.58	2164.64	2665.9	1.44		201.1	13.4488	20.732	36.0672	55.5994
201.13	0.578135	1.10347e-13	9.6156e-07	9.02584e-14	7.18967e-14	9.61186e-07	9.61262e-07	6.54786	8.22012	2.43745	3.05994	6293.71	7901.69	2342.84	2941.41	1.44		201.175	12.1548	19.1196	32.597	51.2752
201.22	0.550318	7.00353e-14	1.29309e-06	4.30134e-14	1.83147e-14	1.29291e-06	1.29301e-06	13.7399	32.2691	5.11468	12.0122	17764.5	41724.4	6612.83	15531.9	1.44		201.35	11.5135	17.8398	30.8772	47.8431
201.48	0.569795	1.26899e-13	1.15026e-06	1.02868e-13	8.09025e-14	1.14983e-06	1.14992e-06	5.74523	7.30508	2.13866	2.71932	6606.05	8400.29	2459.1	3127.01	1.44		201.535	9.6182	13.9903	25.7943	37.5196
201.59	0.605466	1.00793e-13	1.27922e-06	7.4064e-14	4.96327e-14	1.27891e-06	1.27901e-06	7.97959	11.9075	2.9704	4.43256	10205.2	15229.8	3798.89	5669.31	1.44		201.705	7.96648	11.6782	21.3646	31.3188
201.82	0.519732	7.86266e-14	1.02064e-06	5.73001e-14	3.78071e-14	1.02041e-06	1.02049e-06	10.3141	15.632	3.83943	5.81901	10524.6	15952.2	3917.78	5938.23	1.44		201.85	5.55713	8.05115	14.9032	21.5917
201.88	0.553883	7.98512e-14	8.92556e-07	6.12021e-14	4.41563e-14	8.92302e-07	8.92373e-07	9.65653	13.3843	3.59465	4.9823	8616.54	11943.8	3207.51	4446.07	1.44		201.92	4.96059	7.18441	13.3034	19.2673
201.96	0.470405	3.78965e-13	9.64629e-07	3.58835e-13	3.40436e-13	9.6314e-07	9.63216e-07	1.647	1.73601	0.613095	0.64623	1586.29	1672.15	590.496	622.459	1.44		201.97	3.43422	5.14266	9.20996	13.7917
201.98	0.510813	7.07241e-14	1.18024e-06	4.6061e-14	2.35183e-14	1.18005e-06	1.18014e-06	12.8308	25.1293	4.77627	9.3544	15141	29656.2	5636.24	11039.5	1.44		201.99	3.21946	4.74413	8.634	12.7229
202	0.456592	7.02001e-14	7.48705e-07	5.45569e-14	4.02585e-14	7.48479e-07	7.48538e-07	10.8327	14.6801	4.03249	5.46468	8108.07	10988.6	3018.23	4090.52	1.44		202.03	3.07452	4.50031	8.24531	12.069
202.06	0.473858	1.05234e-13	1.2452e-06	7.92165e-14	5.54354e-14	1.24487e-06	1.24497e-06	7.46057	10.6611	2.7772	3.96858	9287.47	13272.7	3457.27	4940.78	1.44		202.11	2.39147	3.5541	6.4135	9.53144
202.16	0.465706	7.09465e-14	8.58285e-07	5.30129e-14	3.66211e-14	8.58065e-07	8.58133e-07	11.1482	16.1382	4.14993	6.00746	9565.91	13848.8	3560.91	5155.2	1.44		202.25	1.315	2.00382	3.52658	5.37388
202.34	0.346541	5.61219e-14	7.70411e-07	4.00238e-14	2.53097e-14	7.70245e-07	7.70306e-07	14.7662	23.3508	5.49673	8.69233	11373.6	17987.2	4233.83	6695.76	1.44		202.52	0	0	0	0
202.7	0.303731	2.82515e-13	3.78241e-07	2.74633e-13	2.6743e-13	3.77102e-07	3.77132e-07	2.15196	2.20993	0.801068	0.822646	811.507	833.433	302.084	310.246	1.66		202.775	-4.1102	-6.24396	-11.0228	-16.7452
202.85	0.260026	3.82299e-13	2.0484e-07	3.78051e-13	3.74168e-13	2.03272e-07	2.03288e-07	1.56328	1.57951	0.581932	0.587972	317.771	321.094	118.29	119.527	1.66		202.895	-17.2743	-19.6709	-46.3265	-52.7539
202.94	0.279793	7.74508e-13	2.41356e-07	7.6953e-13	7.6498e-13	2.38163e-07	2.38182e-07	0.768001	0.772569	0.285889	0.287589	182.91	184.012	68.0882	68.4986	1.66		203.055	-29.9995	-32.5096	-80.4532	-87.1849
203.17	0.223336	2.49907e-13	2.84793e-07	2.43976e-13	2.38555e-13	2.83781e-07	2.83803e-07	2.42237	2.47742	0.901728	0.92222	687.422	703.099	255.893	261.729	1.66		203.205	-53.5348	-56.4847	-143.571	-151.482
203.24	0.189501	2.6196e-13	2.17697e-07	2.57433e-13	2.53295e-13	2.16629e-07	2.16646e-07	2.29574	2.33325	0.854591	0.868554	497.324	505.489	185.129	188.169	1.66		203.275	-58.3739	-61.4188	-156.548	-164.714
203.31	0.226232	5.17429e-13	3.62345e-07	5.099e-13	5.03018e-13	3.60229e-07	3.60257e-07	1.15905	1.17491	0.431457	0.43736	417.524	423.269	155.423	157.562	1.66		203.345	-65.0097	-68.157	-174.344	-182.785
203.38	0.278705	3.8431e-13	3.39117e-07	3.77255e-13	3.70807e-13	3.37552e-07	3.37579e-07	1.56658	1.59382	0.58316	0.593301	528.802	538.041	196.847	200.286	1.66		203.59	-73.4177	-76.698	-196.893	-205.69
203.8	0.239447	7.61044e-13	2.33311e-07	7.56233e-13	7.51836e-13	2.30173e-07	2.30191e-07	0.781505	0.786075	0.290916	0.292617	179.881	180.948	66.9608	67.3578	1.66		203.95	-132.108	-136.183	-354.289	-365.219
204.1	0.339325	2.48537e-13	2.14896e-07	2.44067e-13	2.39981e-13	2.13883e-07	2.139e-07	2.42147	2.4627	0.901394	0.91674	517.911	526.771	192.793	196.091	1.66		204.125	-162.817	-167.332	-436.647	-448.754
204.15	0.246246	4.02766e-13	2.1733e-07	3.98258e-13	3.94138e-13	2.15677e-07	2.15694e-07	1.48396	1.49948	0.552406	0.558181	320.057	323.429	119.141	120.396	1.66
								f=5.9E-13	f=5.9E-13	f=2.2E-13	f=2.2E-13	f=5.9E-13	f=5.9E-13	f=2.2E-13	f=2.2E-13	calculated from			f=5.9E-13	f=5.9E-13	f=2.2E-13	f=2.2E-13
			terr. 3He/4He end member:	2.09e-08	4e-08	2.09e-08	4e-08	2.09e-08	4e-08	2.09e-08	4e-08	2.09e-08	4e-08	2.09e-08	4e-08	phys. prop. data			4e-08	2.09e-08	4e-08	2.09e-08
																(Montadert et al., 1979)
